# Supplementary material
Source: publisher figshare collection journal article supplement (https://acs.figshare.com/ndownloader/files/3846952)
Supplement: Supplementary file 1 [file 3846952]

#  begin CIF for structure 1 of 3 
 
data_tl8hg2_fm3m_100k 
 
_audit_creation_method            SHELXL-97 
 
# start Validation Reply Form
_vrf_PLAT974_tl8hg2_fm3m_100k
;
PROBLEM: Check Calcd Negative Residual Density on Hg2B -1.91 eA-3 
RESPONSE: This is not a significant amount of residual density in an absolute sense
 and also in comparison to the total density at this site based upon a Fourier map
 calculation (SHELXL), namely 69.97 eA-3 at the x=0.5 y=0.0 z=0.0 site for Hg2B.
;
# end Validation Reply Form

_chemical_formula_sum     'Cl6 Cs2 Hg0.18 Tl1.82' 
_chemical_formula_weight          886.59 
 
loop_ 
 _atom_type_symbol 
 _atom_type_description 
 _atom_type_scat_dispersion_real 
 _atom_type_scat_dispersion_imag 
 _atom_type_scat_source 
 'Cl'  'Cl'   0.1484   0.1585 
 'International Tables Vol C Tables 4.2.6.8 and 6.1.1.4' 
 'Cs'  'Cs'  -0.3680   2.1192 
 'International Tables Vol C Tables 4.2.6.8 and 6.1.1.4' 
 'Hg'  'Hg'  -2.3894   9.2266 
 'International Tables Vol C Tables 4.2.6.8 and 6.1.1.4' 
 'Tl'  'Tl'  -2.8358   9.6688 
 'International Tables Vol C Tables 4.2.6.8 and 6.1.1.4' 
 
_space_group_crystal_system       cubic 
_space_group_name_H-M_alt         'F m -3 m' 
 
loop_ 
 _symmetry_equiv_pos_as_xyz 
 'x, y, z' 
 '-x, -y, z' 
 '-x, y, -z' 
 'x, -y, -z' 
 'z, x, y' 
 'z, -x, -y' 
 '-z, -x, y' 
 '-z, x, -y' 
 'y, z, x' 
 '-y, z, -x' 
 'y, -z, -x' 
 '-y, -z, x' 
 'y, x, -z' 
 '-y, -x, -z' 
 'y, -x, z' 
 '-y, x, z' 
 'x, z, -y' 
 '-x, z, y' 
 '-x, -z, -y' 
 'x, -z, y' 
 'z, y, -x' 
 'z, -y, x' 
 '-z, y, x' 
 '-z, -y, -x' 
 'x, y+1/2, z+1/2' 
 '-x, -y+1/2, z+1/2' 
 '-x, y+1/2, -z+1/2' 
 'x, -y+1/2, -z+1/2' 
 'z, x+1/2, y+1/2' 
 'z, -x+1/2, -y+1/2' 
 '-z, -x+1/2, y+1/2' 
 '-z, x+1/2, -y+1/2' 
 'y, z+1/2, x+1/2' 
 '-y, z+1/2, -x+1/2' 
 'y, -z+1/2, -x+1/2' 
 '-y, -z+1/2, x+1/2' 
 'y, x+1/2, -z+1/2' 
 '-y, -x+1/2, -z+1/2' 
 'y, -x+1/2, z+1/2' 
 '-y, x+1/2, z+1/2' 
 'x, z+1/2, -y+1/2' 
 '-x, z+1/2, y+1/2' 
 '-x, -z+1/2, -y+1/2' 
 'x, -z+1/2, y+1/2' 
 'z, y+1/2, -x+1/2' 
 'z, -y+1/2, x+1/2' 
 '-z, y+1/2, x+1/2' 
 '-z, -y+1/2, -x+1/2' 
 'x+1/2, y, z+1/2' 
 '-x+1/2, -y, z+1/2' 
 '-x+1/2, y, -z+1/2' 
 'x+1/2, -y, -z+1/2' 
 'z+1/2, x, y+1/2' 
 'z+1/2, -x, -y+1/2' 
 '-z+1/2, -x, y+1/2' 
 '-z+1/2, x, -y+1/2' 
 'y+1/2, z, x+1/2' 
 '-y+1/2, z, -x+1/2' 
 'y+1/2, -z, -x+1/2' 
 '-y+1/2, -z, x+1/2' 
 'y+1/2, x, -z+1/2' 
 '-y+1/2, -x, -z+1/2' 
 'y+1/2, -x, z+1/2' 
 '-y+1/2, x, z+1/2' 
 'x+1/2, z, -y+1/2' 
 '-x+1/2, z, y+1/2' 
 '-x+1/2, -z, -y+1/2' 
 'x+1/2, -z, y+1/2' 
 'z+1/2, y, -x+1/2' 
 'z+1/2, -y, x+1/2' 
 '-z+1/2, y, x+1/2' 
 '-z+1/2, -y, -x+1/2' 
 'x+1/2, y+1/2, z' 
 '-x+1/2, -y+1/2, z' 
 '-x+1/2, y+1/2, -z' 
 'x+1/2, -y+1/2, -z' 
 'z+1/2, x+1/2, y' 
 'z+1/2, -x+1/2, -y' 
 '-z+1/2, -x+1/2, y' 
 '-z+1/2, x+1/2, -y' 
 'y+1/2, z+1/2, x' 
 '-y+1/2, z+1/2, -x' 
 'y+1/2, -z+1/2, -x' 
 '-y+1/2, -z+1/2, x' 
 'y+1/2, x+1/2, -z' 
 '-y+1/2, -x+1/2, -z' 
 'y+1/2, -x+1/2, z' 
 '-y+1/2, x+1/2, z' 
 'x+1/2, z+1/2, -y' 
 '-x+1/2, z+1/2, y' 
 '-x+1/2, -z+1/2, -y' 
 'x+1/2, -z+1/2, y' 
 'z+1/2, y+1/2, -x' 
 'z+1/2, -y+1/2, x' 
 '-z+1/2, y+1/2, x' 
 '-z+1/2, -y+1/2, -x' 
 '-x, -y, -z' 
 'x, y, -z' 
 'x, -y, z' 
 '-x, y, z' 
 '-z, -x, -y' 
 '-z, x, y' 
 'z, x, -y' 
 'z, -x, y' 
 '-y, -z, -x' 
 'y, -z, x' 
 '-y, z, x' 
 'y, z, -x' 
 '-y, -x, z' 
 'y, x, z' 
 '-y, x, -z' 
 'y, -x, -z' 
 '-x, -z, y' 
 'x, -z, -y' 
 'x, z, y' 
 '-x, z, -y' 
 '-z, -y, x' 
 '-z, y, -x' 
 'z, -y, -x' 
 'z, y, x' 
 '-x, -y+1/2, -z+1/2' 
 'x, y+1/2, -z+1/2' 
 'x, -y+1/2, z+1/2' 
 '-x, y+1/2, z+1/2' 
 '-z, -x+1/2, -y+1/2' 
 '-z, x+1/2, y+1/2' 
 'z, x+1/2, -y+1/2' 
 'z, -x+1/2, y+1/2' 
 '-y, -z+1/2, -x+1/2' 
 'y, -z+1/2, x+1/2' 
 '-y, z+1/2, x+1/2' 
 'y, z+1/2, -x+1/2' 
 '-y, -x+1/2, z+1/2' 
 'y, x+1/2, z+1/2' 
 '-y, x+1/2, -z+1/2' 
 'y, -x+1/2, -z+1/2' 
 '-x, -z+1/2, y+1/2' 
 'x, -z+1/2, -y+1/2' 
 'x, z+1/2, y+1/2' 
 '-x, z+1/2, -y+1/2' 
 '-z, -y+1/2, x+1/2' 
 '-z, y+1/2, -x+1/2' 
 'z, -y+1/2, -x+1/2' 
 'z, y+1/2, x+1/2' 
 '-x+1/2, -y, -z+1/2' 
 'x+1/2, y, -z+1/2' 
 'x+1/2, -y, z+1/2' 
 '-x+1/2, y, z+1/2' 
 '-z+1/2, -x, -y+1/2' 
 '-z+1/2, x, y+1/2' 
 'z+1/2, x, -y+1/2' 
 'z+1/2, -x, y+1/2' 
 '-y+1/2, -z, -x+1/2' 
 'y+1/2, -z, x+1/2' 
 '-y+1/2, z, x+1/2' 
 'y+1/2, z, -x+1/2' 
 '-y+1/2, -x, z+1/2' 
 'y+1/2, x, z+1/2' 
 '-y+1/2, x, -z+1/2' 
 'y+1/2, -x, -z+1/2' 
 '-x+1/2, -z, y+1/2' 
 'x+1/2, -z, -y+1/2' 
 'x+1/2, z, y+1/2' 
 '-x+1/2, z, -y+1/2' 
 '-z+1/2, -y, x+1/2' 
 '-z+1/2, y, -x+1/2' 
 'z+1/2, -y, -x+1/2' 
 'z+1/2, y, x+1/2' 
 '-x+1/2, -y+1/2, -z' 
 'x+1/2, y+1/2, -z' 
 'x+1/2, -y+1/2, z' 
 '-x+1/2, y+1/2, z' 
 '-z+1/2, -x+1/2, -y' 
 '-z+1/2, x+1/2, y' 
 'z+1/2, x+1/2, -y' 
 'z+1/2, -x+1/2, y' 
 '-y+1/2, -z+1/2, -x' 
 'y+1/2, -z+1/2, x' 
 '-y+1/2, z+1/2, x' 
 'y+1/2, z+1/2, -x' 
 '-y+1/2, -x+1/2, z' 
 'y+1/2, x+1/2, z' 
 '-y+1/2, x+1/2, -z' 
 'y+1/2, -x+1/2, -z' 
 '-x+1/2, -z+1/2, y' 
 'x+1/2, -z+1/2, -y' 
 'x+1/2, z+1/2, y' 
 '-x+1/2, z+1/2, -y' 
 '-z+1/2, -y+1/2, x' 
 '-z+1/2, y+1/2, -x' 
 'z+1/2, -y+1/2, -x' 
 'z+1/2, y+1/2, x' 
 
_cell_length_a                    10.804(2) 
_cell_length_b                    10.804(2) 
_cell_length_c                    10.804(2) 
_cell_angle_alpha                 90.00 
_cell_angle_beta                  90.00 
_cell_angle_gamma                 90.00 
_cell_volume                      1261.3(5) 
_cell_formula_units_Z             4 
_cell_measurement_temperature     100(2) 
_cell_measurement_reflns_used     2253 
_cell_measurement_theta_min       3.27 
_cell_measurement_theta_max       31.75 
 
_exptl_crystal_description        block
_exptl_crystal_colour             yellow
_exptl_crystal_size_max           0.22 
_exptl_crystal_size_mid           0.17 
_exptl_crystal_size_min           0.12 
_exptl_crystal_density_meas       ? 
_exptl_crystal_density_diffrn     4.669 
_exptl_crystal_density_method     'not measured' 
_exptl_crystal_F_000              1495 
_exptl_absorpt_coefficient_mu     32.313 
_exptl_absorpt_correction_type    multi-scan
_exptl_absorpt_correction_T_min   0.3215  
_exptl_absorpt_correction_T_max   0.7464
_exptl_absorpt_process_details    'Bruker SAINT (SADABS)'
 
_exptl_special_details 
; 
 ? 
; 
 
_diffrn_ambient_temperature       100(2) 
_diffrn_radiation_wavelength      0.71073 
_diffrn_radiation_type            MoK\a 
_diffrn_radiation_source          'fine-focus sealed tube' 
_diffrn_radiation_monochromator   graphite 
_diffrn_measurement_device_type   'Bruker APEX CCD' 
_diffrn_measurement_method        '\f and \w scans' 
_diffrn_detector_area_resol_mean  ? 
_diffrn_reflns_number             4615 
_diffrn_reflns_av_R_equivalents   0.0674 
_diffrn_reflns_av_sigmaI/netI     0.0266 
_diffrn_reflns_limit_h_min        -14 
_diffrn_reflns_limit_h_max        14 
_diffrn_reflns_limit_k_min        -14 
_diffrn_reflns_limit_k_max        14 
_diffrn_reflns_limit_l_min        -14 
_diffrn_reflns_limit_l_max        14 
_diffrn_reflns_theta_min          3.27 
_diffrn_reflns_theta_max          29.49 
_reflns_number_total              122 
_reflns_number_gt                 122 
_reflns_threshold_expression      >2sigma(I) 
 
_computing_data_collection        'Bruker SMART'
_computing_cell_refinement        'Bruker SAINT' 
_computing_data_reduction         'Bruker SAINT' 
_computing_structure_solution     'SHELXS-97 (Sheldrick, 2008)' 
_computing_structure_refinement   'SHELXL-97 (Sheldrick, 2008)' 
_computing_molecular_graphics     'Bruker SHELXTL' 
_computing_publication_material   'Bruker SHELXTL' 
 
_refine_special_details 
; 
 Refinement of F^2^ against ALL reflections.  The weighted R-factor wR and 
 goodness of fit S are based on F^2^, conventional R-factors R are based 
 on F, with F set to zero for negative F^2^. The threshold expression of 
 F^2^ > 2sigma(F^2^) is used only for calculating R-factors(gt) etc. and is 
 not relevant to the choice of reflections for refinement.  R-factors based 
 on F^2^ are statistically about twice as large as those based on F, and R- 
 factors based on ALL data will be even larger. 
; 
 
_refine_ls_structure_factor_coef  Fsqd  
_refine_ls_matrix_type            full 
_refine_ls_weighting_scheme       calc  
_refine_ls_weighting_details 
 'calc w=1/[\s^2^(Fo^2^)+(0.0330P)^2^+155.0000P] where P=(Fo^2^+2Fc^2^)/3' 
_atom_sites_solution_primary      direct 
_atom_sites_solution_secondary    difmap 
_refine_ls_extinction_method      none 
_refine_ls_extinction_coef        ? 
_refine_ls_number_reflns          122 
_refine_ls_number_parameters      15 
_refine_ls_number_restraints      0 
_refine_ls_R_factor_all           0.0409 
_refine_ls_R_factor_gt            0.0409 
_refine_ls_wR_factor_ref          0.0970 
_refine_ls_wR_factor_gt           0.0970 
_refine_ls_goodness_of_fit_ref    0.996 
_refine_ls_restrained_S_all       0.996 
_refine_ls_shift/su_max           0.000 
_refine_ls_shift/su_mean          0.000 
 
loop_ 
 _atom_site_label 
 _atom_site_type_symbol 
 _atom_site_fract_x 
 _atom_site_fract_y 
 _atom_site_fract_z 
 _atom_site_U_iso_or_equiv 
 _atom_site_adp_type 
 _atom_site_occupancy 
 _atom_site_symmetry_multiplicity 
 _atom_site_calc_flag 
 _atom_site_refinement_flags 
 _atom_site_disorder_assembly 
 _atom_site_disorder_group 
Tl1 Tl 0.0000 0.0000 0.0000 0.0283(5) Uani 1 48 d S . . 
Tl2A Tl 0.5729(8) 0.0000 0.0000 0.065(2) Uani 0.14 8 d SP . . 
Hg2B Hg 0.5000 0.0000 0.0000 0.005 Uiso 0.18 48 d SP . . 
Cs1A Cs 0.2500 0.2500 0.2500 0.0748(14) Uani 0.87 24 d SP . 1 
Cl1A Cl 0.2407(7) 0.0000 0.0000 0.0593(19) Uani 0.87 8 d SP . 1 
Cs1B Cs 0.282(2) 0.218(2) 0.218(2) 0.038(7) Uiso 0.03 6 d SP . 2 
Cl1B Cl 0.165(4) 0.165(4) 0.0000 0.046(13) Uani 0.06 4 d SP . 2 
 
loop_ 
 _atom_site_aniso_label 
 _atom_site_aniso_U_11 
 _atom_site_aniso_U_22 
 _atom_site_aniso_U_33 
 _atom_site_aniso_U_23 
 _atom_site_aniso_U_13 
 _atom_site_aniso_U_12 
Tl1 0.0283(5) 0.0283(5) 0.0283(5) 0.000 0.000 0.000 
Tl2A 0.102(5) 0.047(2) 0.047(2) 0.000 0.000 0.000 
Cs1A 0.0748(14) 0.0748(14) 0.0748(14) 0.000 0.000 0.000 
Cl1A 0.055(4) 0.062(3) 0.062(3) 0.000 0.000 0.000 
Cl1B 0.05(2) 0.05(2) 0.03(3) 0.000 0.000 -0.02(2) 
 
_geom_special_details 
; 
 All esds (except the esd in the dihedral angle between two l.s. planes) 
 are estimated using the full covariance matrix.  The cell esds are taken 
 into account individually in the estimation of esds in distances, angles 
 and torsion angles; correlations between esds in cell parameters are only 
 used when they are defined by crystal symmetry.  An approximate (isotropic) 
 treatment of cell esds is used for estimating esds involving l.s. planes. 
; 
 
loop_ 
 _geom_bond_atom_site_label_1 
 _geom_bond_atom_site_label_2 
 _geom_bond_distance 
 _geom_bond_site_symmetry_2 
 _geom_bond_publ_flag 
Tl1 Cl1B 2.52(5) 105 ? 
Tl1 Cl1B 2.52(5) 9 ? 
Tl1 Cl1B 2.52(5) 101 ? 
Tl1 Cl1B 2.52(5) 5 ? 
Tl1 Cl1B 2.52(5) . ? 
Tl1 Cl1B 2.52(5) 97 ? 
Tl1 Cl1B 2.52(5) 107 ? 
Tl1 Cl1B 2.52(5) 11 ? 
Tl1 Cl1B 2.52(5) 103 ? 
Tl1 Cl1B 2.52(5) 7 ? 
Tl1 Cl1B 2.52(5) 99 ? 
Tl1 Cl1B 2.52(5) 3 ? 
Tl1 Cl1A 2.601(8) . ? 
Tl1 Cl1A 2.601(8) 5 ? 
Tl1 Cl1A 2.601(8) 101 ? 
Tl1 Cl1A 2.601(8) 9 ? 
Tl1 Cl1A 2.601(8) 105 ? 
Tl1 Cl1A 2.601(8) 97 ? 
Tl2A Hg2B 0.788(9) . ? 
Tl2A Tl2A 1.115(12) 153 ? 
Tl2A Tl2A 1.115(12) 173 ? 
Tl2A Tl2A 1.115(12) 57_554 ? 
Tl2A Tl2A 1.115(12) 77_545 ? 
Tl2A Tl2A 1.576(17) 97_655 ? 
Tl2A Cl1A 2.013(11) 97_655 ? 
Tl2A Cl1A 2.910(8) 57_554 ? 
Tl2A Cl1A 2.910(8) 77_545 ? 
Tl2A Cl1A 2.910(8) 153 ? 
Tl2A Cl1A 2.910(8) 173 ? 
Tl2A Cs1B 3.67(4) 100_655 ? 
Hg2B Tl2A 0.788(9) 153 ? 
Hg2B Tl2A 0.788(9) 57_554 ? 
Hg2B Tl2A 0.788(9) 173 ? 
Hg2B Tl2A 0.788(9) 97_655 ? 
Hg2B Tl2A 0.788(9) 77_545 ? 
Hg2B Cl1A 2.801(8) 153 ? 
Hg2B Cl1A 2.801(8) 57_554 ? 
Hg2B Cl1A 2.801(8) . ? 
Hg2B Cl1A 2.801(8) 97_655 ? 
Hg2B Cl1A 2.801(8) 77_545 ? 
Hg2B Cl1A 2.801(8) 173 ? 
Cs1A Cl1A 3.8213(9) 9 ? 
Cs1A Cl1A 3.8213(9) 5 ? 
Cs1A Cl1A 3.8213(9) . ? 
Cs1A Cl1A 3.8213(9) 81 ? 
Cs1A Cl1A 3.8213(9) 53 ? 
Cs1A Cl1A 3.8213(9) 25 ? 
Cs1A Cl1A 3.8213(9) 153 ? 
Cs1A Cl1A 3.8213(9) 129 ? 
Cs1A Cl1A 3.8213(9) 173 ? 
Cs1A Cl1A 3.8213(9) 125 ? 
Cs1A Cl1A 3.8213(9) 169 ? 
Cs1A Cl1A 3.8213(9) 145 ? 
Cl1A Tl2A 2.013(11) 97_655 ? 
Cl1A Tl2A 2.910(8) 57_554 ? 
Cl1A Tl2A 2.910(8) 77_545 ? 
Cl1A Tl2A 2.910(8) 153 ? 
Cl1A Tl2A 2.910(8) 173 ? 
Cl1A Cs1A 3.8213(9) 25_544 ? 
Cl1A Cs1A 3.8213(9) 169 ? 
Cl1A Cs1A 3.8213(9) 145 ? 
Cs1B Cs1B 0.99(7) 28 ? 
Cs1B Cs1B 0.99(7) 51 ? 
Cs1B Cs1B 0.99(7) 74 ? 
Cs1B Cl1B 2.73(3) 9 ? 
Cs1B Cl1B 2.73(3) . ? 
Cs1B Cl1B 2.73(3) 151 ? 
Cs1B Cl1B 2.73(3) 79 ? 
Cs1B Cl1B 2.73(3) 153 ? 
Cs1B Cl1B 2.73(3) 169 ? 
Cs1B Cl1B 3.16(2) 5 ? 
Cs1B Cl1B 3.16(2) 179 ? 
Cs1B Cl1B 3.16(2) 51 ? 
Cs1B Cl1B 3.54(5) 35 ? 
Cs1B Cl1B 3.54(5) 123 ? 
Cs1B Cl1B 3.54(5) 125 ? 
Cs1B Tl2A 3.67(4) 97_655 ? 
Cs1B Tl2A 3.67(4) 77_545 ? 
Cs1B Tl2A 3.67(4) 57_554 ? 
Cl1B Cs1B 2.73(3) 74 ? 
Cl1B Cs1B 2.73(3) 98 ? 
Cl1B Cs1B 2.73(3) 169 ? 
Cl1B Cs1B 3.16(2) 51 ? 
Cl1B Cs1B 3.16(2) 148_554 ? 
Cl1B Cs1B 3.54(5) 28 ? 
Cl1B Cs1B 3.54(5) 123_554 ? 
 
loop_ 
 _geom_angle_atom_site_label_1 
 _geom_angle_atom_site_label_2 
 _geom_angle_atom_site_label_3 
 _geom_angle 
 _geom_angle_site_symmetry_1 
 _geom_angle_site_symmetry_3 
 _geom_angle_publ_flag 
Cl1B Tl1 Cl1B 180(2) 105 9 ? 
Cl1B Tl1 Cl1B 60.000(1) 105 101 ? 
Cl1B Tl1 Cl1B 120.000(1) 9 101 ? 
Cl1B Tl1 Cl1B 120.000(1) 105 5 ? 
Cl1B Tl1 Cl1B 60.000(1) 9 5 ? 
Cl1B Tl1 Cl1B 180(2) 101 5 ? 
Cl1B Tl1 Cl1B 120.000(1) 105 . ? 
Cl1B Tl1 Cl1B 60.000(1) 9 . ? 
Cl1B Tl1 Cl1B 120.0 101 . ? 
Cl1B Tl1 Cl1B 60.0 5 . ? 
Cl1B Tl1 Cl1B 60.000(1) 105 97 ? 
Cl1B Tl1 Cl1B 120.000(1) 9 97 ? 
Cl1B Tl1 Cl1B 60.0 101 97 ? 
Cl1B Tl1 Cl1B 120.0 5 97 ? 
Cl1B Tl1 Cl1B 180(2) . 97 ? 
Cl1B Tl1 Cl1B 90.000(1) 105 107 ? 
Cl1B Tl1 Cl1B 90.000(1) 9 107 ? 
Cl1B Tl1 Cl1B 120.000(1) 101 107 ? 
Cl1B Tl1 Cl1B 60.000(1) 5 107 ? 
Cl1B Tl1 Cl1B 120.0 . 107 ? 
Cl1B Tl1 Cl1B 60.0 97 107 ? 
Cl1B Tl1 Cl1B 90.000(1) 105 11 ? 
Cl1B Tl1 Cl1B 90.000(1) 9 11 ? 
Cl1B Tl1 Cl1B 60.000(1) 101 11 ? 
Cl1B Tl1 Cl1B 120.000(1) 5 11 ? 
Cl1B Tl1 Cl1B 60.0 . 11 ? 
Cl1B Tl1 Cl1B 120.0 97 11 ? 
Cl1B Tl1 Cl1B 180(2) 107 11 ? 
Cl1B Tl1 Cl1B 60.000(1) 105 103 ? 
Cl1B Tl1 Cl1B 120.000(1) 9 103 ? 
Cl1B Tl1 Cl1B 90.000(1) 101 103 ? 
Cl1B Tl1 Cl1B 90.000(1) 5 103 ? 
Cl1B Tl1 Cl1B 60.0 . 103 ? 
Cl1B Tl1 Cl1B 120.0 97 103 ? 
Cl1B Tl1 Cl1B 120.000(1) 107 103 ? 
Cl1B Tl1 Cl1B 60.000(1) 11 103 ? 
Cl1B Tl1 Cl1B 120.000(1) 105 7 ? 
Cl1B Tl1 Cl1B 60.000(1) 9 7 ? 
Cl1B Tl1 Cl1B 90.000(1) 101 7 ? 
Cl1B Tl1 Cl1B 90.000(1) 5 7 ? 
Cl1B Tl1 Cl1B 120.0 . 7 ? 
Cl1B Tl1 Cl1B 60.0 97 7 ? 
Cl1B Tl1 Cl1B 60.000(1) 107 7 ? 
Cl1B Tl1 Cl1B 120.000(1) 11 7 ? 
Cl1B Tl1 Cl1B 180(2) 103 7 ? 
Cl1B Tl1 Cl1B 120.0 105 99 ? 
Cl1B Tl1 Cl1B 60.0 9 99 ? 
Cl1B Tl1 Cl1B 60.000(1) 101 99 ? 
Cl1B Tl1 Cl1B 120.000(1) 5 99 ? 
Cl1B Tl1 Cl1B 90.000(1) . 99 ? 
Cl1B Tl1 Cl1B 90.000(1) 97 99 ? 
Cl1B Tl1 Cl1B 120.0 107 99 ? 
Cl1B Tl1 Cl1B 60.0 11 99 ? 
Cl1B Tl1 Cl1B 120.000(1) 103 99 ? 
Cl1B Tl1 Cl1B 60.000(1) 7 99 ? 
Cl1B Tl1 Cl1B 60.0 105 3 ? 
Cl1B Tl1 Cl1B 120.0 9 3 ? 
Cl1B Tl1 Cl1B 120.000(1) 101 3 ? 
Cl1B Tl1 Cl1B 60.000(1) 5 3 ? 
Cl1B Tl1 Cl1B 90.000(1) . 3 ? 
Cl1B Tl1 Cl1B 90.000(1) 97 3 ? 
Cl1B Tl1 Cl1B 60.0 107 3 ? 
Cl1B Tl1 Cl1B 120.0 11 3 ? 
Cl1B Tl1 Cl1B 60.000(1) 103 3 ? 
Cl1B Tl1 Cl1B 120.000(1) 7 3 ? 
Cl1B Tl1 Cl1B 180(2) 99 3 ? 
Cl1B Tl1 Cl1A 135.0 105 . ? 
Cl1B Tl1 Cl1A 45.0 9 . ? 
Cl1B Tl1 Cl1A 90.0 101 . ? 
Cl1B Tl1 Cl1A 90.0 5 . ? 
Cl1B Tl1 Cl1A 45.0 . . ? 
Cl1B Tl1 Cl1A 135.0 97 . ? 
Cl1B Tl1 Cl1A 135.0 107 . ? 
Cl1B Tl1 Cl1A 45.0 11 . ? 
Cl1B Tl1 Cl1A 90.0 103 . ? 
Cl1B Tl1 Cl1A 90.0 7 . ? 
Cl1B Tl1 Cl1A 45.0 99 . ? 
Cl1B Tl1 Cl1A 135.0 3 . ? 
Cl1B Tl1 Cl1A 90.0 105 5 ? 
Cl1B Tl1 Cl1A 90.0 9 5 ? 
Cl1B Tl1 Cl1A 135.0 101 5 ? 
Cl1B Tl1 Cl1A 45.0 5 5 ? 
Cl1B Tl1 Cl1A 45.000(1) . 5 ? 
Cl1B Tl1 Cl1A 135.000(1) 97 5 ? 
Cl1B Tl1 Cl1A 90.0 107 5 ? 
Cl1B Tl1 Cl1A 90.0 11 5 ? 
Cl1B Tl1 Cl1A 45.0 103 5 ? 
Cl1B Tl1 Cl1A 135.0 7 5 ? 
Cl1B Tl1 Cl1A 135.000(1) 99 5 ? 
Cl1B Tl1 Cl1A 45.000(1) 3 5 ? 
Cl1A Tl1 Cl1A 90.0 . 5 ? 
Cl1B Tl1 Cl1A 90.0 105 101 ? 
Cl1B Tl1 Cl1A 90.0 9 101 ? 
Cl1B Tl1 Cl1A 45.0 101 101 ? 
Cl1B Tl1 Cl1A 135.0 5 101 ? 
Cl1B Tl1 Cl1A 135.000(1) . 101 ? 
Cl1B Tl1 Cl1A 45.000(1) 97 101 ? 
Cl1B Tl1 Cl1A 90.0 107 101 ? 
Cl1B Tl1 Cl1A 90.0 11 101 ? 
Cl1B Tl1 Cl1A 135.0 103 101 ? 
Cl1B Tl1 Cl1A 45.0 7 101 ? 
Cl1B Tl1 Cl1A 45.000(1) 99 101 ? 
Cl1B Tl1 Cl1A 135.000(1) 3 101 ? 
Cl1A Tl1 Cl1A 90.0 . 101 ? 
Cl1A Tl1 Cl1A 180.0 5 101 ? 
Cl1B Tl1 Cl1A 135.000(1) 105 9 ? 
Cl1B Tl1 Cl1A 45.000(1) 9 9 ? 
Cl1B Tl1 Cl1A 135.000(1) 101 9 ? 
Cl1B Tl1 Cl1A 45.000(1) 5 9 ? 
Cl1B Tl1 Cl1A 90.000(2) . 9 ? 
Cl1B Tl1 Cl1A 90.000(2) 97 9 ? 
Cl1B Tl1 Cl1A 45.000(1) 107 9 ? 
Cl1B Tl1 Cl1A 135.000(1) 11 9 ? 
Cl1B Tl1 Cl1A 135.000(1) 103 9 ? 
Cl1B Tl1 Cl1A 45.000(1) 7 9 ? 
Cl1B Tl1 Cl1A 90.0 99 9 ? 
Cl1B Tl1 Cl1A 90.0 3 9 ? 
Cl1A Tl1 Cl1A 90.0 . 9 ? 
Cl1A Tl1 Cl1A 90.0 5 9 ? 
Cl1A Tl1 Cl1A 90.0 101 9 ? 
Cl1B Tl1 Cl1A 45.000(1) 105 105 ? 
Cl1B Tl1 Cl1A 135.000(1) 9 105 ? 
Cl1B Tl1 Cl1A 45.000(1) 101 105 ? 
Cl1B Tl1 Cl1A 135.000(1) 5 105 ? 
Cl1B Tl1 Cl1A 90.000(2) . 105 ? 
Cl1B Tl1 Cl1A 90.000(2) 97 105 ? 
Cl1B Tl1 Cl1A 135.000(1) 107 105 ? 
Cl1B Tl1 Cl1A 45.000(1) 11 105 ? 
Cl1B Tl1 Cl1A 45.000(1) 103 105 ? 
Cl1B Tl1 Cl1A 135.000(1) 7 105 ? 
Cl1B Tl1 Cl1A 90.0 99 105 ? 
Cl1B Tl1 Cl1A 90.0 3 105 ? 
Cl1A Tl1 Cl1A 90.0 . 105 ? 
Cl1A Tl1 Cl1A 90.0 5 105 ? 
Cl1A Tl1 Cl1A 90.0 101 105 ? 
Cl1A Tl1 Cl1A 180.0 9 105 ? 
Cl1B Tl1 Cl1A 45.0 105 97 ? 
Cl1B Tl1 Cl1A 135.0 9 97 ? 
Cl1B Tl1 Cl1A 90.0 101 97 ? 
Cl1B Tl1 Cl1A 90.0 5 97 ? 
Cl1B Tl1 Cl1A 135.0 . 97 ? 
Cl1B Tl1 Cl1A 45.0 97 97 ? 
Cl1B Tl1 Cl1A 45.0 107 97 ? 
Cl1B Tl1 Cl1A 135.0 11 97 ? 
Cl1B Tl1 Cl1A 90.0 103 97 ? 
Cl1B Tl1 Cl1A 90.0 7 97 ? 
Cl1B Tl1 Cl1A 135.0 99 97 ? 
Cl1B Tl1 Cl1A 45.0 3 97 ? 
Cl1A Tl1 Cl1A 180.0 . 97 ? 
Cl1A Tl1 Cl1A 90.0 5 97 ? 
Cl1A Tl1 Cl1A 90.0 101 97 ? 
Cl1A Tl1 Cl1A 90.0 9 97 ? 
Cl1A Tl1 Cl1A 90.0 105 97 ? 
Hg2B Tl2A Tl2A 45.0 . 153 ? 
Hg2B Tl2A Tl2A 45.0 . 173 ? 
Tl2A Tl2A Tl2A 60.0 153 173 ? 
Hg2B Tl2A Tl2A 45.0 . 57_554 ? 
Tl2A Tl2A Tl2A 90.0 153 57_554 ? 
Tl2A Tl2A Tl2A 60.0 173 57_554 ? 
Hg2B Tl2A Tl2A 45.0 . 77_545 ? 
Tl2A Tl2A Tl2A 60.0 153 77_545 ? 
Tl2A Tl2A Tl2A 90.0 173 77_545 ? 
Tl2A Tl2A Tl2A 60.0 57_554 77_545 ? 
Hg2B Tl2A Tl2A 0.0 . 97_655 ? 
Tl2A Tl2A Tl2A 45.0 153 97_655 ? 
Tl2A Tl2A Tl2A 45.0 173 97_655 ? 
Tl2A Tl2A Tl2A 45.0 57_554 97_655 ? 
Tl2A Tl2A Tl2A 45.0 77_545 97_655 ? 
Hg2B Tl2A Cl1A 180.0 . 97_655 ? 
Tl2A Tl2A Cl1A 135.0 153 97_655 ? 
Tl2A Tl2A Cl1A 135.0 173 97_655 ? 
Tl2A Tl2A Cl1A 135.0 57_554 97_655 ? 
Tl2A Tl2A Cl1A 135.0 77_545 97_655 ? 
Tl2A Tl2A Cl1A 180.0 97_655 97_655 ? 
Hg2B Tl2A Cl1A 74.29(17) . 57_554 ? 
Tl2A Tl2A Cl1A 29.29(17) 153 57_554 ? 
Tl2A Tl2A Cl1A 78.96(11) 173 57_554 ? 
Tl2A Tl2A Cl1A 119.29(17) 57_554 57_554 ? 
Tl2A Tl2A Cl1A 78.96(11) 77_545 57_554 ? 
Tl2A Tl2A Cl1A 74.29(17) 97_655 57_554 ? 
Cl1A Tl2A Cl1A 105.71(17) 97_655 57_554 ? 
Hg2B Tl2A Cl1A 74.29(17) . 77_545 ? 
Tl2A Tl2A Cl1A 78.96(11) 153 77_545 ? 
Tl2A Tl2A Cl1A 29.29(17) 173 77_545 ? 
Tl2A Tl2A Cl1A 78.96(11) 57_554 77_545 ? 
Tl2A Tl2A Cl1A 119.29(17) 77_545 77_545 ? 
Tl2A Tl2A Cl1A 74.29(17) 97_655 77_545 ? 
Cl1A Tl2A Cl1A 105.71(17) 97_655 77_545 ? 
Cl1A Tl2A Cl1A 85.79(9) 57_554 77_545 ? 
Hg2B Tl2A Cl1A 74.29(17) . 153 ? 
Tl2A Tl2A Cl1A 119.29(17) 153 153 ? 
Tl2A Tl2A Cl1A 78.96(11) 173 153 ? 
Tl2A Tl2A Cl1A 29.29(17) 57_554 153 ? 
Tl2A Tl2A Cl1A 78.96(11) 77_545 153 ? 
Tl2A Tl2A Cl1A 74.29(17) 97_655 153 ? 
Cl1A Tl2A Cl1A 105.71(17) 97_655 153 ? 
Cl1A Tl2A Cl1A 148.6(3) 57_554 153 ? 
Cl1A Tl2A Cl1A 85.79(9) 77_545 153 ? 
Hg2B Tl2A Cl1A 74.29(17) . 173 ? 
Tl2A Tl2A Cl1A 78.96(11) 153 173 ? 
Tl2A Tl2A Cl1A 119.29(17) 173 173 ? 
Tl2A Tl2A Cl1A 78.96(11) 57_554 173 ? 
Tl2A Tl2A Cl1A 29.29(17) 77_545 173 ? 
Tl2A Tl2A Cl1A 74.29(17) 97_655 173 ? 
Cl1A Tl2A Cl1A 105.71(17) 97_655 173 ? 
Cl1A Tl2A Cl1A 85.79(9) 57_554 173 ? 
Cl1A Tl2A Cl1A 148.6(3) 77_545 173 ? 
Cl1A Tl2A Cl1A 85.79(9) 153 173 ? 
Hg2B Tl2A Cs1B 115.18(17) . 100_655 ? 
Tl2A Tl2A Cs1B 138.88(11) 153 100_655 ? 
Tl2A Tl2A Cs1B 138.88(11) 173 100_655 ? 
Tl2A Tl2A Cs1B 81.28(15) 57_554 100_655 ? 
Tl2A Tl2A Cs1B 81.28(15) 77_545 100_655 ? 
Tl2A Tl2A Cs1B 115.18(17) 97_655 100_655 ? 
Cl1A Tl2A Cs1B 64.82(17) 97_655 100_655 ? 
Cl1A Tl2A Cs1B 136.99(7) 57_554 100_655 ? 
Cl1A Tl2A Cs1B 136.99(7) 77_545 100_655 ? 
Cl1A Tl2A Cs1B 59.95(8) 153 100_655 ? 
Cl1A Tl2A Cs1B 59.95(8) 173 100_655 ? 
Tl2A Hg2B Tl2A 90.0 153 . ? 
Tl2A Hg2B Tl2A 180.0 153 57_554 ? 
Tl2A Hg2B Tl2A 90.0 . 57_554 ? 
Tl2A Hg2B Tl2A 90.0 153 173 ? 
Tl2A Hg2B Tl2A 90.0 . 173 ? 
Tl2A Hg2B Tl2A 90.0 57_554 173 ? 
Tl2A Hg2B Tl2A 90.0 153 97_655 ? 
Tl2A Hg2B Tl2A 180.0 . 97_655 ? 
Tl2A Hg2B Tl2A 90.0 57_554 97_655 ? 
Tl2A Hg2B Tl2A 90.0 173 97_655 ? 
Tl2A Hg2B Tl2A 90.0 153 77_545 ? 
Tl2A Hg2B Tl2A 90.0 . 77_545 ? 
Tl2A Hg2B Tl2A 90.0 57_554 77_545 ? 
Tl2A Hg2B Tl2A 180.0 173 77_545 ? 
Tl2A Hg2B Tl2A 90.0 97_655 77_545 ? 
Tl2A Hg2B Cl1A 180.0 153 153 ? 
Tl2A Hg2B Cl1A 90.0 . 153 ? 
Tl2A Hg2B Cl1A 0.0 57_554 153 ? 
Tl2A Hg2B Cl1A 90.0 173 153 ? 
Tl2A Hg2B Cl1A 90.0 97_655 153 ? 
Tl2A Hg2B Cl1A 90.0 77_545 153 ? 
Tl2A Hg2B Cl1A 0.0 153 57_554 ? 
Tl2A Hg2B Cl1A 90.0 . 57_554 ? 
Tl2A Hg2B Cl1A 180.0 57_554 57_554 ? 
Tl2A Hg2B Cl1A 90.0 173 57_554 ? 
Tl2A Hg2B Cl1A 90.0 97_655 57_554 ? 
Tl2A Hg2B Cl1A 90.0 77_545 57_554 ? 
Cl1A Hg2B Cl1A 180.0 153 57_554 ? 
Tl2A Hg2B Cl1A 90.0 153 . ? 
Tl2A Hg2B Cl1A 180.0 . . ? 
Tl2A Hg2B Cl1A 90.0 57_554 . ? 
Tl2A Hg2B Cl1A 90.0 173 . ? 
Tl2A Hg2B Cl1A 0.0 97_655 . ? 
Tl2A Hg2B Cl1A 90.0 77_545 . ? 
Cl1A Hg2B Cl1A 90.0 153 . ? 
Cl1A Hg2B Cl1A 90.0 57_554 . ? 
Tl2A Hg2B Cl1A 90.0 153 97_655 ? 
Tl2A Hg2B Cl1A 0.0 . 97_655 ? 
Tl2A Hg2B Cl1A 90.0 57_554 97_655 ? 
Tl2A Hg2B Cl1A 90.0 173 97_655 ? 
Tl2A Hg2B Cl1A 180.0 97_655 97_655 ? 
Tl2A Hg2B Cl1A 90.0 77_545 97_655 ? 
Cl1A Hg2B Cl1A 90.0 153 97_655 ? 
Cl1A Hg2B Cl1A 90.0 57_554 97_655 ? 
Cl1A Hg2B Cl1A 180.0 . 97_655 ? 
Tl2A Hg2B Cl1A 90.0 153 77_545 ? 
Tl2A Hg2B Cl1A 90.0 . 77_545 ? 
Tl2A Hg2B Cl1A 90.0 57_554 77_545 ? 
Tl2A Hg2B Cl1A 0.0 173 77_545 ? 
Tl2A Hg2B Cl1A 90.0 97_655 77_545 ? 
Tl2A Hg2B Cl1A 180.0 77_545 77_545 ? 
Cl1A Hg2B Cl1A 90.0 153 77_545 ? 
Cl1A Hg2B Cl1A 90.0 57_554 77_545 ? 
Cl1A Hg2B Cl1A 90.0 . 77_545 ? 
Cl1A Hg2B Cl1A 90.0 97_655 77_545 ? 
Tl2A Hg2B Cl1A 90.0 153 173 ? 
Tl2A Hg2B Cl1A 90.0 . 173 ? 
Tl2A Hg2B Cl1A 90.0 57_554 173 ? 
Tl2A Hg2B Cl1A 180.0 173 173 ? 
Tl2A Hg2B Cl1A 90.0 97_655 173 ? 
Tl2A Hg2B Cl1A 0.0 77_545 173 ? 
Cl1A Hg2B Cl1A 90.0 153 173 ? 
Cl1A Hg2B Cl1A 90.0 57_554 173 ? 
Cl1A Hg2B Cl1A 90.0 . 173 ? 
Cl1A Hg2B Cl1A 90.0 97_655 173 ? 
Cl1A Hg2B Cl1A 180.0 77_545 173 ? 
Cl1A Cs1A Cl1A 57.54(19) 9 5 ? 
Cl1A Cs1A Cl1A 57.54(19) 9 . ? 
Cl1A Cs1A Cl1A 57.54(19) 5 . ? 
Cl1A Cs1A Cl1A 177.0(2) 9 81 ? 
Cl1A Cs1A Cl1A 119.977(3) 5 81 ? 
Cl1A Cs1A Cl1A 119.977(3) . 81 ? 
Cl1A Cs1A Cl1A 119.977(3) 9 53 ? 
Cl1A Cs1A Cl1A 177.0(2) 5 53 ? 
Cl1A Cs1A Cl1A 119.977(3) . 53 ? 
Cl1A Cs1A Cl1A 62.44(18) 81 53 ? 
Cl1A Cs1A Cl1A 119.977(4) 9 25 ? 
Cl1A Cs1A Cl1A 119.977(3) 5 25 ? 
Cl1A Cs1A Cl1A 177.0(2) . 25 ? 
Cl1A Cs1A Cl1A 62.44(18) 81 25 ? 
Cl1A Cs1A Cl1A 62.44(18) 53 25 ? 
Cl1A Cs1A Cl1A 90.039(6) 9 153 ? 
Cl1A Cs1A Cl1A 119.977(3) 5 153 ? 
Cl1A Cs1A Cl1A 62.44(18) . 153 ? 
Cl1A Cs1A Cl1A 90.039(6) 81 153 ? 
Cl1A Cs1A Cl1A 57.54(19) 53 153 ? 
Cl1A Cs1A Cl1A 119.977(3) 25 153 ? 
Cl1A Cs1A Cl1A 90.039(6) 9 129 ? 
Cl1A Cs1A Cl1A 62.44(18) 5 129 ? 
Cl1A Cs1A Cl1A 119.977(3) . 129 ? 
Cl1A Cs1A Cl1A 90.039(6) 81 129 ? 
Cl1A Cs1A Cl1A 119.977(3) 53 129 ? 
Cl1A Cs1A Cl1A 57.54(19) 25 129 ? 
Cl1A Cs1A Cl1A 177.0(2) 153 129 ? 
Cl1A Cs1A Cl1A 119.977(3) 9 173 ? 
Cl1A Cs1A Cl1A 90.039(6) 5 173 ? 
Cl1A Cs1A Cl1A 62.44(18) . 173 ? 
Cl1A Cs1A Cl1A 57.54(19) 81 173 ? 
Cl1A Cs1A Cl1A 90.039(6) 53 173 ? 
Cl1A Cs1A Cl1A 119.977(3) 25 173 ? 
Cl1A Cs1A Cl1A 62.44(18) 153 173 ? 
Cl1A Cs1A Cl1A 119.977(3) 129 173 ? 
Cl1A Cs1A Cl1A 62.44(18) 9 125 ? 
Cl1A Cs1A Cl1A 90.039(6) 5 125 ? 
Cl1A Cs1A Cl1A 119.977(3) . 125 ? 
Cl1A Cs1A Cl1A 119.977(3) 81 125 ? 
Cl1A Cs1A Cl1A 90.039(6) 53 125 ? 
Cl1A Cs1A Cl1A 57.54(19) 25 125 ? 
Cl1A Cs1A Cl1A 119.977(3) 153 125 ? 
Cl1A Cs1A Cl1A 57.54(19) 129 125 ? 
Cl1A Cs1A Cl1A 177.0(2) 173 125 ? 
Cl1A Cs1A Cl1A 119.977(3) 9 169 ? 
Cl1A Cs1A Cl1A 62.44(18) 5 169 ? 
Cl1A Cs1A Cl1A 90.039(6) . 169 ? 
Cl1A Cs1A Cl1A 57.54(19) 81 169 ? 
Cl1A Cs1A Cl1A 119.977(4) 53 169 ? 
Cl1A Cs1A Cl1A 90.039(6) 25 169 ? 
Cl1A Cs1A Cl1A 119.977(4) 153 169 ? 
Cl1A Cs1A Cl1A 62.44(18) 129 169 ? 
Cl1A Cs1A Cl1A 57.54(19) 173 169 ? 
Cl1A Cs1A Cl1A 119.977(3) 125 169 ? 
Cl1A Cs1A Cl1A 62.44(18) 9 145 ? 
Cl1A Cs1A Cl1A 119.977(3) 5 145 ? 
Cl1A Cs1A Cl1A 90.039(6) . 145 ? 
Cl1A Cs1A Cl1A 119.977(4) 81 145 ? 
Cl1A Cs1A Cl1A 57.54(19) 53 145 ? 
Cl1A Cs1A Cl1A 90.039(6) 25 145 ? 
Cl1A Cs1A Cl1A 57.54(19) 153 145 ? 
Cl1A Cs1A Cl1A 119.977(3) 129 145 ? 
Cl1A Cs1A Cl1A 119.977(4) 173 145 ? 
Cl1A Cs1A Cl1A 62.44(18) 125 145 ? 
Cl1A Cs1A Cl1A 177.0(2) 169 145 ? 
Tl2A Cl1A Tl1 180.0 97_655 . ? 
Tl2A Cl1A Hg2B 0.0 97_655 . ? 
Tl1 Cl1A Hg2B 180.0 . . ? 
Tl2A Cl1A Tl2A 15.71(17) 97_655 57_554 ? 
Tl1 Cl1A Tl2A 164.29(17) . 57_554 ? 
Hg2B Cl1A Tl2A 15.71(17) . 57_554 ? 
Tl2A Cl1A Tl2A 15.71(17) 97_655 77_545 ? 
Tl1 Cl1A Tl2A 164.29(17) . 77_545 ? 
Hg2B Cl1A Tl2A 15.71(17) . 77_545 ? 
Tl2A Cl1A Tl2A 22.1(2) 57_554 77_545 ? 
Tl2A Cl1A Tl2A 15.71(17) 97_655 153 ? 
Tl1 Cl1A Tl2A 164.29(17) . 153 ? 
Hg2B Cl1A Tl2A 15.71(17) . 153 ? 
Tl2A Cl1A Tl2A 31.4(3) 57_554 153 ? 
Tl2A Cl1A Tl2A 22.1(2) 77_545 153 ? 
Tl2A Cl1A Tl2A 15.71(17) 97_655 173 ? 
Tl1 Cl1A Tl2A 164.29(17) . 173 ? 
Hg2B Cl1A Tl2A 15.71(17) . 173 ? 
Tl2A Cl1A Tl2A 22.1(2) 57_554 173 ? 
Tl2A Cl1A Tl2A 31.4(3) 77_545 173 ? 
Tl2A Cl1A Tl2A 22.1(2) 153 173 ? 
Tl2A Cl1A Cs1A 88.50(11) 97_655 . ? 
Tl1 Cl1A Cs1A 91.50(11) . . ? 
Hg2B Cl1A Cs1A 88.50(11) . . ? 
Tl2A Cl1A Cs1A 77.49(14) 57_554 . ? 
Tl2A Cl1A Cs1A 77.49(14) 77_545 . ? 
Tl2A Cl1A Cs1A 99.57(18) 153 . ? 
Tl2A Cl1A Cs1A 99.57(18) 173 . ? 
Tl2A Cl1A Cs1A 88.50(11) 97_655 25_544 ? 
Tl1 Cl1A Cs1A 91.50(11) . 25_544 ? 
Hg2B Cl1A Cs1A 88.50(11) . 25_544 ? 
Tl2A Cl1A Cs1A 99.57(18) 57_554 25_544 ? 
Tl2A Cl1A Cs1A 99.57(18) 77_545 25_544 ? 
Tl2A Cl1A Cs1A 77.49(14) 153 25_544 ? 
Tl2A Cl1A Cs1A 77.49(14) 173 25_544 ? 
Cs1A Cl1A Cs1A 177.0(2) . 25_544 ? 
Tl2A Cl1A Cs1A 88.50(11) 97_655 169 ? 
Tl1 Cl1A Cs1A 91.50(11) . 169 ? 
Hg2B Cl1A Cs1A 88.50(11) . 169 ? 
Tl2A Cl1A Cs1A 99.57(18) 57_554 169 ? 
Tl2A Cl1A Cs1A 77.49(14) 77_545 169 ? 
Tl2A Cl1A Cs1A 77.49(14) 153 169 ? 
Tl2A Cl1A Cs1A 99.57(18) 173 169 ? 
Cs1A Cl1A Cs1A 89.961(6) . 169 ? 
Cs1A Cl1A Cs1A 89.961(6) 25_544 169 ? 
Tl2A Cl1A Cs1A 88.50(11) 97_655 145 ? 
Tl1 Cl1A Cs1A 91.50(11) . 145 ? 
Hg2B Cl1A Cs1A 88.50(11) . 145 ? 
Tl2A Cl1A Cs1A 77.49(14) 57_554 145 ? 
Tl2A Cl1A Cs1A 99.57(18) 77_545 145 ? 
Tl2A Cl1A Cs1A 99.57(18) 153 145 ? 
Tl2A Cl1A Cs1A 77.49(14) 173 145 ? 
Cs1A Cl1A Cs1A 89.961(6) . 145 ? 
Cs1A Cl1A Cs1A 89.961(6) 25_544 145 ? 
Cs1A Cl1A Cs1A 177.0(2) 169 145 ? 
Cs1B Cs1B Cs1B 60.000(5) 28 51 ? 
Cs1B Cs1B Cs1B 60.000(6) 28 74 ? 
Cs1B Cs1B Cs1B 60.000(6) 51 74 ? 
Cs1B Cs1B Cl1B 139.1(8) 28 9 ? 
Cs1B Cs1B Cl1B 79.6(8) 51 9 ? 
Cs1B Cs1B Cl1B 106.2(10) 74 9 ? 
Cs1B Cs1B Cl1B 139.1(8) 28 . ? 
Cs1B Cs1B Cl1B 106.2(10) 51 . ? 
Cs1B Cs1B Cl1B 79.6(8) 74 . ? 
Cl1B Cs1B Cl1B 54.8(19) 9 . ? 
Cs1B Cs1B Cl1B 79.6(8) 28 151 ? 
Cs1B Cs1B Cl1B 106.2(10) 51 151 ? 
Cs1B Cs1B Cl1B 139.1(8) 74 151 ? 
Cl1B Cs1B Cl1B 108.5(9) 9 151 ? 
Cl1B Cs1B Cl1B 139.2(17) . 151 ? 
Cs1B Cs1B Cl1B 79.6(8) 28 79 ? 
Cs1B Cs1B Cl1B 139.1(8) 51 79 ? 
Cs1B Cs1B Cl1B 106.2(10) 74 79 ? 
Cl1B Cs1B Cl1B 139.2(17) 9 79 ? 
Cl1B Cs1B Cl1B 108.5(9) . 79 ? 
Cl1B Cs1B Cl1B 57(2) 151 79 ? 
Cs1B Cs1B Cl1B 106.2(10) 28 153 ? 
Cs1B Cs1B Cl1B 79.6(8) 51 153 ? 
Cs1B Cs1B Cl1B 139.1(8) 74 153 ? 
Cl1B Cs1B Cl1B 57(2) 9 153 ? 
Cl1B Cs1B Cl1B 108.5(9) . 153 ? 
Cl1B Cs1B Cl1B 54.8(19) 151 153 ? 
Cl1B Cs1B Cl1B 108.5(9) 79 153 ? 
Cs1B Cs1B Cl1B 106.2(10) 28 169 ? 
Cs1B Cs1B Cl1B 139.1(8) 51 169 ? 
Cs1B Cs1B Cl1B 79.6(8) 74 169 ? 
Cl1B Cs1B Cl1B 108.5(9) 9 169 ? 
Cl1B Cs1B Cl1B 57(2) . 169 ? 
Cl1B Cs1B Cl1B 108.5(9) 151 169 ? 
Cl1B Cs1B Cl1B 54.8(19) 79 169 ? 
Cl1B Cs1B Cl1B 139.2(17) 153 169 ? 
Cs1B Cs1B Cl1B 104.9(12) 28 5 ? 
Cs1B Cs1B Cl1B 56.3(9) 51 5 ? 
Cs1B Cs1B Cl1B 56.3(9) 74 5 ? 
Cl1B Cs1B Cl1B 49.9(15) 9 5 ? 
Cl1B Cs1B Cl1B 49.9(15) . 5 ? 
Cl1B Cs1B Cl1B 151.4(11) 151 5 ? 
Cl1B Cs1B Cl1B 151.4(11) 79 5 ? 
Cl1B Cs1B Cl1B 97.5(5) 153 5 ? 
Cl1B Cs1B Cl1B 97.5(5) 169 5 ? 
Cs1B Cs1B Cl1B 56.3(9) 28 179 ? 
Cs1B Cs1B Cl1B 104.9(12) 51 179 ? 
Cs1B Cs1B Cl1B 56.3(9) 74 179 ? 
Cl1B Cs1B Cl1B 151.4(11) 9 179 ? 
Cl1B Cs1B Cl1B 97.5(5) . 179 ? 
Cl1B Cs1B Cl1B 97.5(5) 151 179 ? 
Cl1B Cs1B Cl1B 49.9(15) 79 179 ? 
Cl1B Cs1B Cl1B 151.4(11) 153 179 ? 
Cl1B Cs1B Cl1B 49.9(15) 169 179 ? 
Cl1B Cs1B Cl1B 108.5(12) 5 179 ? 
Cs1B Cs1B Cl1B 56.3(9) 28 51 ? 
Cs1B Cs1B Cl1B 56.3(9) 51 51 ? 
Cs1B Cs1B Cl1B 104.9(12) 74 51 ? 
Cl1B Cs1B Cl1B 97.5(5) 9 51 ? 
Cl1B Cs1B Cl1B 151.4(11) . 51 ? 
Cl1B Cs1B Cl1B 49.9(15) 151 51 ? 
Cl1B Cs1B Cl1B 97.5(5) 79 51 ? 
Cl1B Cs1B Cl1B 49.9(15) 153 51 ? 
Cl1B Cs1B Cl1B 151.4(11) 169 51 ? 
Cl1B Cs1B Cl1B 108.5(12) 5 51 ? 
Cl1B Cs1B Cl1B 108.5(12) 179 51 ? 
Cs1B Cs1B Cl1B 30.34(11) 28 35 ? 
Cs1B Cs1B Cl1B 59.5(8) 51 35 ? 
Cs1B Cs1B Cl1B 30.34(11) 74 35 ? 
Cl1B Cs1B Cl1B 130.5(15) 9 35 ? 
Cl1B Cs1B Cl1B 108.8(8) . 35 ? 
Cl1B Cs1B Cl1B 108.8(8) 151 35 ? 
Cl1B Cs1B Cl1B 89.0(6) 79 35 ? 
Cl1B Cs1B Cl1B 130.5(15) 153 35 ? 
Cl1B Cs1B Cl1B 89.0(6) 169 35 ? 
Cl1B Cs1B Cl1B 82.8(9) 5 35 ? 
Cl1B Cs1B Cl1B 45.4(17) 179 35 ? 
Cl1B Cs1B Cl1B 82.8(9) 51 35 ? 
Cs1B Cs1B Cl1B 30.34(11) 28 123 ? 
Cs1B Cs1B Cl1B 30.34(11) 51 123 ? 
Cs1B Cs1B Cl1B 59.5(8) 74 123 ? 
Cl1B Cs1B Cl1B 108.8(8) 9 123 ? 
Cl1B Cs1B Cl1B 130.5(15) . 123 ? 
Cl1B Cs1B Cl1B 89.0(6) 151 123 ? 
Cl1B Cs1B Cl1B 108.8(8) 79 123 ? 
Cl1B Cs1B Cl1B 89.0(6) 153 123 ? 
Cl1B Cs1B Cl1B 130.5(15) 169 123 ? 
Cl1B Cs1B Cl1B 82.8(9) 5 123 ? 
Cl1B Cs1B Cl1B 82.8(9) 179 123 ? 
Cl1B Cs1B Cl1B 45.4(17) 51 123 ? 
Cl1B Cs1B Cl1B 41.6(14) 35 123 ? 
Cs1B Cs1B Cl1B 59.5(8) 28 125 ? 
Cs1B Cs1B Cl1B 30.34(11) 51 125 ? 
Cs1B Cs1B Cl1B 30.34(11) 74 125 ? 
Cl1B Cs1B Cl1B 89.0(6) 9 125 ? 
Cl1B Cs1B Cl1B 89.0(6) . 125 ? 
Cl1B Cs1B Cl1B 130.5(15) 151 125 ? 
Cl1B Cs1B Cl1B 130.5(15) 79 125 ? 
Cl1B Cs1B Cl1B 108.8(8) 153 125 ? 
Cl1B Cs1B Cl1B 108.8(8) 169 125 ? 
Cl1B Cs1B Cl1B 45.4(17) 5 125 ? 
Cl1B Cs1B Cl1B 82.8(9) 179 125 ? 
Cl1B Cs1B Cl1B 82.8(9) 51 125 ? 
Cl1B Cs1B Cl1B 41.6(14) 35 125 ? 
Cl1B Cs1B Cl1B 41.6(14) 123 125 ? 
Cs1B Cs1B Tl2A 154.82(17) 28 97_655 ? 
Cs1B Cs1B Tl2A 138.88(11) 51 97_655 ? 
Cs1B Cs1B Tl2A 138.88(11) 74 97_655 ? 
Cl1B Cs1B Tl2A 60.9(7) 9 97_655 ? 
Cl1B Cs1B Tl2A 60.9(7) . 97_655 ? 
Cl1B Cs1B Tl2A 78.3(9) 151 97_655 ? 
Cl1B Cs1B Tl2A 78.3(9) 79 97_655 ? 
Cl1B Cs1B Tl2A 70.0(9) 153 97_655 ? 
Cl1B Cs1B Tl2A 70.0(9) 169 97_655 ? 
Cl1B Cs1B Tl2A 100.3(11) 5 97_655 ? 
Cl1B Cs1B Tl2A 115.2(12) 179 97_655 ? 
Cl1B Cs1B Tl2A 115.2(12) 51 97_655 ? 
Cl1B Cs1B Tl2A 159.0(7) 35 97_655 ? 
Cl1B Cs1B Tl2A 159.0(7) 123 97_655 ? 
Cl1B Cs1B Tl2A 145.7(8) 125 97_655 ? 
Cs1B Cs1B Tl2A 138.88(11) 28 77_545 ? 
Cs1B Cs1B Tl2A 154.82(17) 51 77_545 ? 
Cs1B Cs1B Tl2A 138.88(11) 74 77_545 ? 
Cl1B Cs1B Tl2A 78.3(9) 9 77_545 ? 
Cl1B Cs1B Tl2A 70.0(9) . 77_545 ? 
Cl1B Cs1B Tl2A 70.0(9) 151 77_545 ? 
Cl1B Cs1B Tl2A 60.9(7) 79 77_545 ? 
Cl1B Cs1B Tl2A 78.3(9) 153 77_545 ? 
Cl1B Cs1B Tl2A 60.9(7) 169 77_545 ? 
Cl1B Cs1B Tl2A 115.2(12) 5 77_545 ? 
Cl1B Cs1B Tl2A 100.3(11) 179 77_545 ? 
Cl1B Cs1B Tl2A 115.2(12) 51 77_545 ? 
Cl1B Cs1B Tl2A 145.7(8) 35 77_545 ? 
Cl1B Cs1B Tl2A 159.0(7) 123 77_545 ? 
Cl1B Cs1B Tl2A 159.0(7) 125 77_545 ? 
Tl2A Cs1B Tl2A 17.4(3) 97_655 77_545 ? 
Cs1B Cs1B Tl2A 138.88(11) 28 57_554 ? 
Cs1B Cs1B Tl2A 138.88(11) 51 57_554 ? 
Cs1B Cs1B Tl2A 154.82(17) 74 57_554 ? 
Cl1B Cs1B Tl2A 70.0(9) 9 57_554 ? 
Cl1B Cs1B Tl2A 78.3(9) . 57_554 ? 
Cl1B Cs1B Tl2A 60.9(7) 151 57_554 ? 
Cl1B Cs1B Tl2A 70.0(9) 79 57_554 ? 
Cl1B Cs1B Tl2A 60.9(7) 153 57_554 ? 
Cl1B Cs1B Tl2A 78.3(9) 169 57_554 ? 
Cl1B Cs1B Tl2A 115.2(12) 5 57_554 ? 
Cl1B Cs1B Tl2A 115.2(12) 179 57_554 ? 
Cl1B Cs1B Tl2A 100.3(11) 51 57_554 ? 
Cl1B Cs1B Tl2A 159.0(7) 35 57_554 ? 
Cl1B Cs1B Tl2A 145.7(8) 123 57_554 ? 
Cl1B Cs1B Tl2A 159.0(7) 125 57_554 ? 
Tl2A Cs1B Tl2A 17.4(3) 97_655 57_554 ? 
Tl2A Cs1B Tl2A 17.4(3) 77_545 57_554 ? 
Tl1 Cl1B Cs1B 118.5(10) . 74 ? 
Tl1 Cl1B Cs1B 118.5(10) . . ? 
Cs1B Cl1B Cs1B 20.9(16) 74 . ? 
Tl1 Cl1B Cs1B 118.5(10) . 98 ? 
Cs1B Cl1B Cs1B 123(2) 74 98 ? 
Cs1B Cl1B Cs1B 119(2) . 98 ? 
Tl1 Cl1B Cs1B 118.5(10) . 169 ? 
Cs1B Cl1B Cs1B 119(2) 74 169 ? 
Cs1B Cl1B Cs1B 123(2) . 169 ? 
Cs1B Cl1B Cs1B 20.9(16) 98 169 ? 
Tl1 Cl1B Cs1B 104.9(12) . 51 ? 
Cs1B Cl1B Cs1B 17.5(12) 74 51 ? 
Cs1B Cl1B Cs1B 17.5(12) . 51 ? 
Cs1B Cl1B Cs1B 135.1(19) 98 51 ? 
Cs1B Cl1B Cs1B 135.1(19) 169 51 ? 
Tl1 Cl1B Cs1B 104.9(12) . 148_554 ? 
Cs1B Cl1B Cs1B 135.1(19) 74 148_554 ? 
Cs1B Cl1B Cs1B 135.1(19) . 148_554 ? 
Cs1B Cl1B Cs1B 17.5(12) 98 148_554 ? 
Cs1B Cl1B Cs1B 17.5(12) 169 148_554 ? 
Cs1B Cl1B Cs1B 150(2) 51 148_554 ? 
Tl1 Cl1B Cs1B 120.5(8) . 28 ? 
Cs1B Cl1B Cs1B 10.5(8) 74 28 ? 
Cs1B Cl1B Cs1B 10.5(8) . 28 ? 
Cs1B Cl1B Cs1B 119.9(18) 98 28 ? 
Cs1B Cl1B Cs1B 119.9(18) 169 28 ? 
Cs1B Cl1B Cs1B 15.7(10) 51 28 ? 
Cs1B Cl1B Cs1B 134.6(17) 148_554 28 ? 
Tl1 Cl1B Cs1B 120.5(8) . 123_554 ? 
Cs1B Cl1B Cs1B 119.9(18) 74 123_554 ? 
Cs1B Cl1B Cs1B 119.9(18) . 123_554 ? 
Cs1B Cl1B Cs1B 10.5(8) 98 123_554 ? 
Cs1B Cl1B Cs1B 10.5(8) 169 123_554 ? 
Cs1B Cl1B Cs1B 134.6(17) 51 123_554 ? 
Cs1B Cl1B Cs1B 15.7(10) 148_554 123_554 ? 
Cs1B Cl1B Cs1B 118.9(16) 28 123_554 ? 
 
_diffrn_measured_fraction_theta_max    1.000 
_diffrn_reflns_theta_full              29.49 
_diffrn_measured_fraction_theta_full   1.000 
_refine_diff_density_max    2.120 
_refine_diff_density_min   -1.818 
_refine_diff_density_rms    0.272 

#  end 1 of 3
#  begin CIF for structure 2 of 3 


data_tl4hg6a_pm-3m 
 
_audit_creation_method            SHELXL-97 

# start Validation Reply Form
_vrf_PLAT241_tl4hg6a_pm-3m 
;
PROBLEM: High Ueq as Compared to Neighbors for ..... Cl1 Check 
RESPONSE: Minor site disorder possible, but refinement of  additional site
 for Cl1 did not converge.
;
_vrf_PLAT043_tl4hg6a_pm-3m
;
PROBLEM: Calculated and Reported Mol. Weight Differ by .. 8.11  Check 
RESPONSE: The IUCR calculation is in error.  The formula below  is correct.
;
# end Validation Reply Form

_chemical_formula_sum       'Cl3 Cs Hg0.88 Tl0.12' 
_chemical_formula_weight          440.30 
 
loop_ 
 _atom_type_symbol 
 _atom_type_description 
 _atom_type_scat_dispersion_real 
 _atom_type_scat_dispersion_imag 
 _atom_type_scat_source 
 'Cl'  'Cl'   0.1484   0.1585 
 'International Tables Vol C Tables 4.2.6.8 and 6.1.1.4' 
 'Cs'  'Cs'  -0.3680   2.1192 
 'International Tables Vol C Tables 4.2.6.8 and 6.1.1.4' 
 'Hg'  'Hg'  -2.3894   9.2266 
 'International Tables Vol C Tables 4.2.6.8 and 6.1.1.4' 
 'Tl'  'Tl'  -2.8358   9.6688 
 'International Tables Vol C Tables 4.2.6.8 and 6.1.1.4' 
 
_symmetry_cell_setting            Cubic 
_symmetry_space_group_name_H-M    Pm-3m 
 
loop_ 
 _symmetry_equiv_pos_as_xyz 
 'x, y, z' 
 '-x, -y, z' 
 '-x, y, -z' 
 'x, -y, -z' 
 'z, x, y' 
 'z, -x, -y' 
 '-z, -x, y' 
 '-z, x, -y' 
 'y, z, x' 
 '-y, z, -x' 
 'y, -z, -x' 
 '-y, -z, x' 
 'y, x, -z' 
 '-y, -x, -z' 
 'y, -x, z' 
 '-y, x, z' 
 'x, z, -y' 
 '-x, z, y' 
 '-x, -z, -y' 
 'x, -z, y' 
 'z, y, -x' 
 'z, -y, x' 
 '-z, y, x' 
 '-z, -y, -x' 
 '-x, -y, -z' 
 'x, y, -z' 
 'x, -y, z' 
 '-x, y, z' 
 '-z, -x, -y' 
 '-z, x, y' 
 'z, x, -y' 
 'z, -x, y' 
 '-y, -z, -x' 
 'y, -z, x' 
 '-y, z, x' 
 'y, z, -x' 
 '-y, -x, z' 
 'y, x, z' 
 '-y, x, -z' 
 'y, -x, -z' 
 '-x, -z, y' 
 'x, -z, -y' 
 'x, z, y' 
 '-x, z, -y' 
 '-z, -y, x' 
 '-z, y, -x' 
 'z, -y, -x' 
 'z, y, x' 
 
_cell_length_a                    5.3739(14) 
_cell_length_b                    5.3739(14) 
_cell_length_c                    5.3739(14) 
_cell_angle_alpha                 90.00 
_cell_angle_beta                  90.00 
_cell_angle_gamma                 90.00 
_cell_volume                      155.19(7) 
_cell_formula_units_Z             1 
_cell_measurement_temperature     100(2) 
_cell_measurement_reflns_used     515 
_cell_measurement_theta_min       3.79 
_cell_measurement_theta_max       31.38 
  
_exptl_crystal_description        block
_exptl_crystal_colour             light_yellow 
_exptl_crystal_size_max           0.12 
_exptl_crystal_size_mid           0.03 
_exptl_crystal_size_min           0.02 
_exptl_crystal_density_meas       ? 
_exptl_crystal_density_diffrn     4.711 
_exptl_crystal_density_method     'not measured' 
_exptl_crystal_F_000              186 
_exptl_absorpt_coefficient_mu     31.859 
_exptl_absorpt_correction_type    multi-scan
_exptl_absorpt_correction_T_min   0.4099  
_exptl_absorpt_correction_T_max   0.7462
_exptl_absorpt_process_details    'Bruker SAINT (SADABS)'
 
_exptl_special_details 
; 
 ? 
; 
 
_diffrn_ambient_temperature       100(2) 
_diffrn_radiation_wavelength      0.71073 
_diffrn_radiation_type            MoK\a 
_diffrn_radiation_source          'fine-focus sealed tube' 
_diffrn_radiation_monochromator   graphite 
_diffrn_measurement_device_type   'Bruker APEX-II CCD' 
_diffrn_measurement_method        '\f and \w scans' 
_diffrn_detector_area_resol_mean  ? 
_diffrn_reflns_number             649 
_diffrn_reflns_av_R_equivalents   0.0255 
_diffrn_reflns_av_sigmaI/netI     0.0130 
_diffrn_reflns_limit_h_min        -6 
_diffrn_reflns_limit_h_max        7 
_diffrn_reflns_limit_k_min        -5 
_diffrn_reflns_limit_k_max        7 
_diffrn_reflns_limit_l_min        -7 
_diffrn_reflns_limit_l_max        4 
_diffrn_reflns_theta_min          3.79 
_diffrn_reflns_theta_max          31.38 
_reflns_number_total              78 
_reflns_number_gt                 78 
_reflns_threshold_expression      >2sigma(I) 
 
_computing_data_collection        'Bruker APEX2' 
_computing_cell_refinement        'Bruker SAINT' 
_computing_data_reduction         'Bruker SAINT' 
_computing_structure_solution     'SHELXS-97 (Sheldrick, 2008)' 
_computing_structure_refinement   'SHELXL-97 (Sheldrick, 2008)' 
_computing_molecular_graphics     'Bruker SHELXTL' 
_computing_publication_material   'Bruker SHELXTL' 
 
_refine_special_details 
; 
 Refinement of F^2^ against ALL reflections.  The weighted R-factor wR and 
 goodness of fit S are based on F^2^, conventional R-factors R are based 
 on F, with F set to zero for negative F^2^. The threshold expression of 
 F^2^ > 2sigma(F^2^) is used only for calculating R-factors(gt) etc. and is 
 not relevant to the choice of reflections for refinement.  R-factors based 
 on F^2^ are statistically about twice as large as those based on F, and R- 
 factors based on ALL data will be even larger. 
; 
 
_refine_ls_structure_factor_coef  Fsqd  
_refine_ls_matrix_type            full 
_refine_ls_weighting_scheme       calc  
_refine_ls_weighting_details 
 'calc w=1/[\s^2^(Fo^2^)+(0.0300P)^2^+4.0000P] where P=(Fo^2^+2Fc^2^)/3' 
_atom_sites_solution_primary      direct 
_atom_sites_solution_secondary    difmap 
_refine_ls_extinction_method      none 
_refine_ls_extinction_coef        ? 
_refine_ls_number_reflns          78 
_refine_ls_number_parameters      7 
_refine_ls_number_restraints      0 
_refine_ls_R_factor_all           0.0326 
_refine_ls_R_factor_gt            0.0326 
_refine_ls_wR_factor_ref          0.0743 
_refine_ls_wR_factor_gt           0.0743 
_refine_ls_goodness_of_fit_ref    1.002 
_refine_ls_restrained_S_all       1.002 
_refine_ls_shift/su_max           0.000 
_refine_ls_shift/su_mean          0.000 
 
loop_ 
 _atom_site_label 
 _atom_site_type_symbol 
 _atom_site_fract_x 
 _atom_site_fract_y 
 _atom_site_fract_z 
 _atom_site_U_iso_or_equiv 
 _atom_site_adp_type 
 _atom_site_occupancy 
 _atom_site_symmetry_multiplicity 
 _atom_site_calc_flag 
 _atom_site_refinement_flags 
 _atom_site_disorder_assembly 
 _atom_site_disorder_group 
Cs1 Cs 0.0000 0.0000 0.0000 0.0472(9) Uani 1 48 d S . . 
Hg1A Hg 0.5000 0.5000 0.5000 0.0216(5) Uani 0.880(8) 48 d SP . 1 
Tl1B Tl 0.346(6) 0.5000 0.5000 0.0216(5) Uani 0.0199(14) 8 d SP . 2 
Cl1 Cl 0.0000 0.5000 0.5000 0.073(3) Uani 1 16 d S . . 
 
loop_ 
 _atom_site_aniso_label 
 _atom_site_aniso_U_11 
 _atom_site_aniso_U_22 
 _atom_site_aniso_U_33 
 _atom_site_aniso_U_23 
 _atom_site_aniso_U_13 
 _atom_site_aniso_U_12 
Cs1 0.0472(9) 0.0472(9) 0.0472(9) 0.000 0.000 0.000 
Hg1A 0.0216(5) 0.0216(5) 0.0216(5) 0.000 0.000 0.000 
Tl1B 0.0216(5) 0.0216(5) 0.0216(5) 0.000 0.000 0.000 
Cl1 0.088(7) 0.065(4) 0.065(4) 0.000 0.000 0.000 
 
_geom_special_details 
; 
 All esds (except the esd in the dihedral angle between two l.s. planes) 
 are estimated using the full covariance matrix.  The cell esds are taken 
 into account individually in the estimation of esds in distances, angles 
 and torsion angles; correlations between esds in cell parameters are only 
 used when they are defined by crystal symmetry.  An approximate (isotropic) 
 treatment of cell esds is used for estimating esds involving l.s. planes. 
; 
 
loop_ 
 _geom_bond_atom_site_label_1 
 _geom_bond_atom_site_label_2 
 _geom_bond_distance 
 _geom_bond_site_symmetry_2 
 _geom_bond_publ_flag 
Cs1 Cl1 3.7999(10) 9 ? 
Cs1 Cl1 3.7999(10) 9_445 ? 
Cs1 Cl1 3.7999(10) . ? 
Cs1 Cl1 3.7999(10) 5 ? 
Cs1 Cl1 3.7999(10) 5_454 ? 
Cs1 Cl1 3.7999(10) 1_544 ? 
Cs1 Cl1 3.7999(10) 9_455 ? 
Cs1 Cl1 3.7999(10) 9_545 ? 
Cs1 Cl1 3.7999(10) 5_455 ? 
Cs1 Cl1 3.7999(10) 5_554 ? 
Cs1 Cl1 3.7999(10) 1_545 ? 
Cs1 Cl1 3.7999(10) 1_554 ? 
Hg1A Cl1 2.6869(7) 9_556 ? 
Hg1A Cl1 2.6869(7) . ? 
Hg1A Cl1 2.6869(7) 1_655 ? 
Hg1A Cl1 2.6869(7) 5 ? 
Hg1A Cl1 2.6869(7) 5_565 ? 
Hg1A Cl1 2.6869(7) 9 ? 
Tl1B Tl1B 1.17(4) 33_666 ? 
Tl1B Tl1B 1.17(4) 29_666 ? 
Tl1B Tl1B 1.17(4) 9 ? 
Tl1B Tl1B 1.17(4) 5 ? 
Tl1B Tl1B 1.66(6) 25_666 ? 
Tl1B Cl1 1.86(3) . ? 
Tl1B Cl1 2.812(9) 9_556 ? 
Tl1B Cl1 2.812(9) 5_565 ? 
Tl1B Cl1 2.812(9) 9 ? 
Tl1B Cl1 2.812(9) 5 ? 
Tl1B Tl1B 3.72(6) 25_566 ? 
Cl1 Tl1B 1.86(3) 25_566 ? 
Cl1 Hg1A 2.6869(7) 1_455 ? 
Cl1 Tl1B 2.812(9) 33_666 ? 
Cl1 Tl1B 2.812(9) 9_455 ? 
Cl1 Tl1B 2.812(9) 29_666 ? 
Cl1 Tl1B 2.812(9) 5_455 ? 
Cl1 Tl1B 2.812(9) 33_566 ? 
Cl1 Tl1B 2.812(9) 9 ? 
Cl1 Tl1B 2.812(9) 5 ? 
Cl1 Tl1B 2.812(9) 29_566 ? 
 
loop_ 
 _geom_angle_atom_site_label_1 
 _geom_angle_atom_site_label_2 
 _geom_angle_atom_site_label_3 
 _geom_angle 
 _geom_angle_site_symmetry_1 
 _geom_angle_site_symmetry_3 
 _geom_angle_publ_flag 
Cl1 Cs1 Cl1 180.0 9 9_445 ? 
Cl1 Cs1 Cl1 60.0 9 . ? 
Cl1 Cs1 Cl1 120.0 9_445 . ? 
Cl1 Cs1 Cl1 60.0 9 5 ? 
Cl1 Cs1 Cl1 120.0 9_445 5 ? 
Cl1 Cs1 Cl1 60.0 . 5 ? 
Cl1 Cs1 Cl1 120.0 9 5_454 ? 
Cl1 Cs1 Cl1 60.0 9_445 5_454 ? 
Cl1 Cs1 Cl1 120.0 . 5_454 ? 
Cl1 Cs1 Cl1 180.0 5 5_454 ? 
Cl1 Cs1 Cl1 120.0 9 1_544 ? 
Cl1 Cs1 Cl1 60.0 9_445 1_544 ? 
Cl1 Cs1 Cl1 180.0 . 1_544 ? 
Cl1 Cs1 Cl1 120.0 5 1_544 ? 
Cl1 Cs1 Cl1 60.0 5_454 1_544 ? 
Cl1 Cs1 Cl1 90.0 9 9_455 ? 
Cl1 Cs1 Cl1 90.0 9_445 9_455 ? 
Cl1 Cs1 Cl1 60.0 . 9_455 ? 
Cl1 Cs1 Cl1 120.0 5 9_455 ? 
Cl1 Cs1 Cl1 60.0 5_454 9_455 ? 
Cl1 Cs1 Cl1 120.0 1_544 9_455 ? 
Cl1 Cs1 Cl1 90.0 9 9_545 ? 
Cl1 Cs1 Cl1 90.0 9_445 9_545 ? 
Cl1 Cs1 Cl1 120.0 . 9_545 ? 
Cl1 Cs1 Cl1 60.0 5 9_545 ? 
Cl1 Cs1 Cl1 120.0 5_454 9_545 ? 
Cl1 Cs1 Cl1 60.0 1_544 9_545 ? 
Cl1 Cs1 Cl1 180.0 9_455 9_545 ? 
Cl1 Cs1 Cl1 120.0 9 5_455 ? 
Cl1 Cs1 Cl1 60.0 9_445 5_455 ? 
Cl1 Cs1 Cl1 60.0 . 5_455 ? 
Cl1 Cs1 Cl1 90.0 5 5_455 ? 
Cl1 Cs1 Cl1 90.0 5_454 5_455 ? 
Cl1 Cs1 Cl1 120.0 1_544 5_455 ? 
Cl1 Cs1 Cl1 60.0 9_455 5_455 ? 
Cl1 Cs1 Cl1 120.0 9_545 5_455 ? 
Cl1 Cs1 Cl1 60.0 9 5_554 ? 
Cl1 Cs1 Cl1 120.0 9_445 5_554 ? 
Cl1 Cs1 Cl1 120.0 . 5_554 ? 
Cl1 Cs1 Cl1 90.0 5 5_554 ? 
Cl1 Cs1 Cl1 90.0 5_454 5_554 ? 
Cl1 Cs1 Cl1 60.0 1_544 5_554 ? 
Cl1 Cs1 Cl1 120.0 9_455 5_554 ? 
Cl1 Cs1 Cl1 60.0 9_545 5_554 ? 
Cl1 Cs1 Cl1 180.0 5_455 5_554 ? 
Cl1 Cs1 Cl1 120.0 9 1_545 ? 
Cl1 Cs1 Cl1 60.0 9_445 1_545 ? 
Cl1 Cs1 Cl1 90.0 . 1_545 ? 
Cl1 Cs1 Cl1 60.0 5 1_545 ? 
Cl1 Cs1 Cl1 120.0 5_454 1_545 ? 
Cl1 Cs1 Cl1 90.0 1_544 1_545 ? 
Cl1 Cs1 Cl1 120.0 9_455 1_545 ? 
Cl1 Cs1 Cl1 60.0 9_545 1_545 ? 
Cl1 Cs1 Cl1 60.0 5_455 1_545 ? 
Cl1 Cs1 Cl1 120.0 5_554 1_545 ? 
Cl1 Cs1 Cl1 60.0 9 1_554 ? 
Cl1 Cs1 Cl1 120.0 9_445 1_554 ? 
Cl1 Cs1 Cl1 90.0 . 1_554 ? 
Cl1 Cs1 Cl1 120.0 5 1_554 ? 
Cl1 Cs1 Cl1 60.0 5_454 1_554 ? 
Cl1 Cs1 Cl1 90.0 1_544 1_554 ? 
Cl1 Cs1 Cl1 60.0 9_455 1_554 ? 
Cl1 Cs1 Cl1 120.0 9_545 1_554 ? 
Cl1 Cs1 Cl1 120.0 5_455 1_554 ? 
Cl1 Cs1 Cl1 60.0 5_554 1_554 ? 
Cl1 Cs1 Cl1 180.0 1_545 1_554 ? 
Cl1 Hg1A Cl1 90.0 9_556 . ? 
Cl1 Hg1A Cl1 90.0 9_556 1_655 ? 
Cl1 Hg1A Cl1 180.0 . 1_655 ? 
Cl1 Hg1A Cl1 90.0 9_556 5 ? 
Cl1 Hg1A Cl1 90.0 . 5 ? 
Cl1 Hg1A Cl1 90.0 1_655 5 ? 
Cl1 Hg1A Cl1 90.0 9_556 5_565 ? 
Cl1 Hg1A Cl1 90.0 . 5_565 ? 
Cl1 Hg1A Cl1 90.0 1_655 5_565 ? 
Cl1 Hg1A Cl1 180.0 5 5_565 ? 
Cl1 Hg1A Cl1 180.0 9_556 9 ? 
Cl1 Hg1A Cl1 90.0 . 9 ? 
Cl1 Hg1A Cl1 90.0 1_655 9 ? 
Cl1 Hg1A Cl1 90.0 5 9 ? 
Cl1 Hg1A Cl1 90.0 5_565 9 ? 
Tl1B Tl1B Tl1B 60.000(9) 33_666 29_666 ? 
Tl1B Tl1B Tl1B 90.000(12) 33_666 9 ? 
Tl1B Tl1B Tl1B 60.000(7) 29_666 9 ? 
Tl1B Tl1B Tl1B 60.000(4) 33_666 5 ? 
Tl1B Tl1B Tl1B 90.000(10) 29_666 5 ? 
Tl1B Tl1B Tl1B 60.000(4) 9 5 ? 
Tl1B Tl1B Tl1B 45.000(7) 33_666 25_666 ? 
Tl1B Tl1B Tl1B 45.000(6) 29_666 25_666 ? 
Tl1B Tl1B Tl1B 45.000(8) 9 25_666 ? 
Tl1B Tl1B Tl1B 45.000(2) 5 25_666 ? 
Tl1B Tl1B Cl1 135.000(4) 33_666 . ? 
Tl1B Tl1B Cl1 135.000(2) 29_666 . ? 
Tl1B Tl1B Cl1 135.000(3) 9 . ? 
Tl1B Tl1B Cl1 135.000(5) 5 . ? 
Tl1B Tl1B Cl1 180.000(2) 25_666 . ? 
Tl1B Tl1B Cl1 27.9(6) 33_666 9_556 ? 
Tl1B Tl1B Cl1 78.0(4) 29_666 9_556 ? 
Tl1B Tl1B Cl1 117.9(6) 9 9_556 ? 
Tl1B Tl1B Cl1 78.0(4) 5 9_556 ? 
Tl1B Tl1B Cl1 72.9(6) 25_666 9_556 ? 
Cl1 Tl1B Cl1 107.1(6) . 9_556 ? 
Tl1B Tl1B Cl1 78.0(4) 33_666 5_565 ? 
Tl1B Tl1B Cl1 27.9(6) 29_666 5_565 ? 
Tl1B Tl1B Cl1 78.0(4) 9 5_565 ? 
Tl1B Tl1B Cl1 117.9(6) 5 5_565 ? 
Tl1B Tl1B Cl1 72.9(6) 25_666 5_565 ? 
Cl1 Tl1B Cl1 107.1(6) . 5_565 ? 
Cl1 Tl1B Cl1 85.0(3) 9_556 5_565 ? 
Tl1B Tl1B Cl1 117.9(6) 33_666 9 ? 
Tl1B Tl1B Cl1 78.0(4) 29_666 9 ? 
Tl1B Tl1B Cl1 27.9(6) 9 9 ? 
Tl1B Tl1B Cl1 78.0(4) 5 9 ? 
Tl1B Tl1B Cl1 72.9(6) 25_666 9 ? 
Cl1 Tl1B Cl1 107.1(6) . 9 ? 
Cl1 Tl1B Cl1 145.7(12) 9_556 9 ? 
Cl1 Tl1B Cl1 85.0(3) 5_565 9 ? 
Tl1B Tl1B Cl1 78.0(4) 33_666 5 ? 
Tl1B Tl1B Cl1 117.9(6) 29_666 5 ? 
Tl1B Tl1B Cl1 78.0(4) 9 5 ? 
Tl1B Tl1B Cl1 27.9(6) 5 5 ? 
Tl1B Tl1B Cl1 72.9(6) 25_666 5 ? 
Cl1 Tl1B Cl1 107.1(6) . 5 ? 
Cl1 Tl1B Cl1 85.0(3) 9_556 5 ? 
Cl1 Tl1B Cl1 145.7(12) 5_565 5 ? 
Cl1 Tl1B Cl1 85.0(3) 9 5 ? 
Tl1B Tl1B Tl1B 135.0 33_666 25_566 ? 
Tl1B Tl1B Tl1B 135.000(1) 29_666 25_566 ? 
Tl1B Tl1B Tl1B 135.0 9 25_566 ? 
Tl1B Tl1B Tl1B 135.000(1) 5 25_566 ? 
Tl1B Tl1B Tl1B 180.000(1) 25_666 25_566 ? 
Cl1 Tl1B Tl1B 0.000(1) . 25_566 ? 
Cl1 Tl1B Tl1B 107.1(6) 9_556 25_566 ? 
Cl1 Tl1B Tl1B 107.1(6) 5_565 25_566 ? 
Cl1 Tl1B Tl1B 107.1(6) 9 25_566 ? 
Cl1 Tl1B Tl1B 107.1(6) 5 25_566 ? 
Tl1B Tl1B Cs1 139.5(2) 33_666 . ? 
Tl1B Tl1B Cs1 139.5(2) 29_666 . ? 
Tl1B Tl1B Cs1 82.0(3) 9 . ? 
Tl1B Tl1B Cs1 82.0(3) 5 . ? 
Tl1B Tl1B Cs1 116.1(4) 25_666 . ? 
Cl1 Tl1B Cs1 63.9(4) . . ? 
Cl1 Tl1B Cs1 137.4(2) 9_556 . ? 
Cl1 Tl1B Cs1 137.4(2) 5_565 . ? 
Cl1 Tl1B Cs1 61.47(18) 9 . ? 
Cl1 Tl1B Cs1 61.47(18) 5 . ? 
Tl1B Tl1B Cs1 63.9(4) 25_566 . ? 
Tl1B Cl1 Tl1B 180.000(5) 25_566 . ? 
Tl1B Cl1 Hg1A 0.000(2) 25_566 1_455 ? 
Tl1B Cl1 Hg1A 180.000(2) . 1_455 ? 
Tl1B Cl1 Hg1A 180.000(2) 25_566 . ? 
Tl1B Cl1 Hg1A 0.000(2) . . ? 
Hg1A Cl1 Hg1A 180.0 1_455 . ? 
Tl1B Cl1 Tl1B 162.9(6) 25_566 33_666 ? 
Tl1B Cl1 Tl1B 17.1(6) . 33_666 ? 
Hg1A Cl1 Tl1B 162.9(6) 1_455 33_666 ? 
Hg1A Cl1 Tl1B 17.1(6) . 33_666 ? 
Tl1B Cl1 Tl1B 17.1(6) 25_566 9_455 ? 
Tl1B Cl1 Tl1B 162.9(6) . 9_455 ? 
Hg1A Cl1 Tl1B 17.1(6) 1_455 9_455 ? 
Hg1A Cl1 Tl1B 162.9(6) . 9_455 ? 
Tl1B Cl1 Tl1B 180.0 33_666 9_455 ? 
Tl1B Cl1 Tl1B 162.9(6) 25_566 29_666 ? 
Tl1B Cl1 Tl1B 17.1(6) . 29_666 ? 
Hg1A Cl1 Tl1B 162.9(6) 1_455 29_666 ? 
Hg1A Cl1 Tl1B 17.1(6) . 29_666 ? 
Tl1B Cl1 Tl1B 24.0(8) 33_666 29_666 ? 
Tl1B Cl1 Tl1B 156.0(8) 9_455 29_666 ? 
Tl1B Cl1 Tl1B 17.1(6) 25_566 5_455 ? 
Tl1B Cl1 Tl1B 162.9(6) . 5_455 ? 
Hg1A Cl1 Tl1B 17.1(6) 1_455 5_455 ? 
Hg1A Cl1 Tl1B 162.9(6) . 5_455 ? 
Tl1B Cl1 Tl1B 156.0(8) 33_666 5_455 ? 
Tl1B Cl1 Tl1B 24.0(8) 9_455 5_455 ? 
Tl1B Cl1 Tl1B 180.000(1) 29_666 5_455 ? 
Tl1B Cl1 Tl1B 17.1(6) 25_566 33_566 ? 
Tl1B Cl1 Tl1B 162.9(6) . 33_566 ? 
Hg1A Cl1 Tl1B 17.1(6) 1_455 33_566 ? 
Hg1A Cl1 Tl1B 162.9(6) . 33_566 ? 
Tl1B Cl1 Tl1B 145.7(12) 33_666 33_566 ? 
Tl1B Cl1 Tl1B 34.3(12) 9_455 33_566 ? 
Tl1B Cl1 Tl1B 156.0(8) 29_666 33_566 ? 
Tl1B Cl1 Tl1B 24.0(8) 5_455 33_566 ? 
Tl1B Cl1 Tl1B 162.9(6) 25_566 9 ? 
Tl1B Cl1 Tl1B 17.1(6) . 9 ? 
Hg1A Cl1 Tl1B 162.9(6) 1_455 9 ? 
Hg1A Cl1 Tl1B 17.1(6) . 9 ? 
Tl1B Cl1 Tl1B 34.3(12) 33_666 9 ? 
Tl1B Cl1 Tl1B 145.7(12) 9_455 9 ? 
Tl1B Cl1 Tl1B 24.0(8) 29_666 9 ? 
Tl1B Cl1 Tl1B 156.0(8) 5_455 9 ? 
Tl1B Cl1 Tl1B 180.000(1) 33_566 9 ? 
Tl1B Cl1 Tl1B 162.9(6) 25_566 5 ? 
Tl1B Cl1 Tl1B 17.1(6) . 5 ? 
Hg1A Cl1 Tl1B 162.9(6) 1_455 5 ? 
Hg1A Cl1 Tl1B 17.1(6) . 5 ? 
Tl1B Cl1 Tl1B 24.0(8) 33_666 5 ? 
Tl1B Cl1 Tl1B 156.0(8) 9_455 5 ? 
Tl1B Cl1 Tl1B 34.3(12) 29_666 5 ? 
Tl1B Cl1 Tl1B 145.7(12) 5_455 5 ? 
Tl1B Cl1 Tl1B 156.0(8) 33_566 5 ? 
Tl1B Cl1 Tl1B 24.0(8) 9 5 ? 
Tl1B Cl1 Tl1B 17.1(6) 25_566 29_566 ? 
Tl1B Cl1 Tl1B 162.9(6) . 29_566 ? 
Hg1A Cl1 Tl1B 17.1(6) 1_455 29_566 ? 
Hg1A Cl1 Tl1B 162.9(6) . 29_566 ? 
Tl1B Cl1 Tl1B 156.0(8) 33_666 29_566 ? 
Tl1B Cl1 Tl1B 24.0(8) 9_455 29_566 ? 
Tl1B Cl1 Tl1B 145.7(12) 29_666 29_566 ? 
Tl1B Cl1 Tl1B 34.3(12) 5_455 29_566 ? 
Tl1B Cl1 Tl1B 24.0(8) 33_566 29_566 ? 
Tl1B Cl1 Tl1B 156.0(8) 9 29_566 ? 
Tl1B Cl1 Tl1B 180.000(2) 5 29_566 ? 
 
_diffrn_measured_fraction_theta_max    1.000 
_diffrn_reflns_theta_full              31.38 
_diffrn_measured_fraction_theta_full   1.000 
_refine_diff_density_max    2.111 
_refine_diff_density_min   -1.387 
_refine_diff_density_rms    0.305 


#  end 2 of 3
#  begin CIF for structure 3 of 3 

 
data_cstl02hg08cl3_pm-3m 
 
_audit_creation_method            SHELXL-97 


# start Validation Reply Form
_vrf_PLAT241_cstl02hg08cl3_pm-3m
;
PROBLEM: High Ueq as Compared to Neighbors for ..... Cl1 Check 
RESPONSE: Minor site disorder possible, but refinement of
 additional site for Cl1 did not converge.
;
# end Validation Reply Form

_chemical_formula_sum      'Cl3 Cs Hg0.95 Tl0.05' 
_chemical_formula_weight          440.04 
 
loop_ 
 _atom_type_symbol 
 _atom_type_description 
 _atom_type_scat_dispersion_real 
 _atom_type_scat_dispersion_imag 
 _atom_type_scat_source 
 'Cl'  'Cl'   0.1484   0.1585 
 'International Tables Vol C Tables 4.2.6.8 and 6.1.1.4' 
 'Cs'  'Cs'  -0.3680   2.1192 
 'International Tables Vol C Tables 4.2.6.8 and 6.1.1.4' 
 'Hg'  'Hg'  -2.3894   9.2266 
 'International Tables Vol C Tables 4.2.6.8 and 6.1.1.4' 
 'Tl'  'Tl'  -2.8358   9.6688 
 'International Tables Vol C Tables 4.2.6.8 and 6.1.1.4' 
 
_symmetry_cell_setting            Cubic 
_symmetry_space_group_name_H-M    Pm-3m 
 
loop_ 
 _symmetry_equiv_pos_as_xyz 
 'x, y, z' 
 '-x, -y, z' 
 '-x, y, -z' 
 'x, -y, -z' 
 'z, x, y' 
 'z, -x, -y' 
 '-z, -x, y' 
 '-z, x, -y' 
 'y, z, x' 
 '-y, z, -x' 
 'y, -z, -x' 
 '-y, -z, x' 
 'y, x, -z' 
 '-y, -x, -z' 
 'y, -x, z' 
 '-y, x, z' 
 'x, z, -y' 
 '-x, z, y' 
 '-x, -z, -y' 
 'x, -z, y' 
 'z, y, -x' 
 'z, -y, x' 
 '-z, y, x' 
 '-z, -y, -x' 
 '-x, -y, -z' 
 'x, y, -z' 
 'x, -y, z' 
 '-x, y, z' 
 '-z, -x, -y' 
 '-z, x, y' 
 'z, x, -y' 
 'z, -x, y' 
 '-y, -z, -x' 
 'y, -z, x' 
 '-y, z, x' 
 'y, z, -x' 
 '-y, -x, z' 
 'y, x, z' 
 '-y, x, -z' 
 'y, -x, -z' 
 '-x, -z, y' 
 'x, -z, -y' 
 'x, z, y' 
 '-x, z, -y' 
 '-z, -y, x' 
 '-z, y, -x' 
 'z, -y, -x' 
 'z, y, x' 
 
_cell_length_a                    5.3750(11) 
_cell_length_b                    5.3750(11) 
_cell_length_c                    5.3750(11) 
_cell_angle_alpha                 90.00 
_cell_angle_beta                  90.00 
_cell_angle_gamma                 90.00 
_cell_volume                      155.29(6) 
_cell_formula_units_Z             1 
_cell_measurement_temperature     100(2) 
_cell_measurement_reflns_used     1122 
_cell_measurement_theta_min       3.79 
_cell_measurement_theta_max       30.23 
  
_exptl_crystal_description        block
_exptl_crystal_colour             yellow
_exptl_crystal_size_max           .10
_exptl_crystal_size_mid           .09
_exptl_crystal_size_min           .02
_exptl_crystal_density_meas       ?
_exptl_crystal_density_diffrn     4.705 
_exptl_crystal_density_method     'not measured' 
_exptl_crystal_F_000              186 
_exptl_absorpt_coefficient_mu     31.753 
_exptl_absorpt_correction_type    multi-scan
_exptl_absorpt_correction_T_min   0.3447  
_exptl_absorpt_correction_T_max   0.7465
_exptl_absorpt_process_details    'Bruker SAINT (SADABS)'
 
_exptl_special_details 
; 
 ? 
; 
 
_diffrn_ambient_temperature       100(2) 
_diffrn_radiation_wavelength      0.71073 
_diffrn_radiation_type            MoK\a 
_diffrn_radiation_source          'fine-focus sealed tube' 
_diffrn_radiation_monochromator   graphite 
_diffrn_measurement_device_type   'Bruker APEX-II CCD' 
_diffrn_measurement_method        '\f and \w scans' 
_diffrn_detector_area_resol_mean  ? 
_diffrn_reflns_number             2039 
_diffrn_reflns_av_R_equivalents   0.0314 
_diffrn_reflns_av_sigmaI/netI     0.0101 
_diffrn_reflns_limit_h_min        -8 
_diffrn_reflns_limit_h_max        8 
_diffrn_reflns_limit_k_min        -7 
_diffrn_reflns_limit_k_max        7 
_diffrn_reflns_limit_l_min        -8 
_diffrn_reflns_limit_l_max        8 
_diffrn_reflns_theta_min          3.79 
_diffrn_reflns_theta_max          32.49 
_reflns_number_total              85 
_reflns_number_gt                 85 
_reflns_threshold_expression      >2sigma(I) 
 
_computing_data_collection        'Bruker APEX2' 
_computing_cell_refinement        'Bruker SAINT' 
_computing_data_reduction         'Bruker SAINT' 
_computing_structure_solution     'SHELXS-97 (Sheldrick, 2008)' 
_computing_structure_refinement   'SHELXL-97 (Sheldrick, 2008)' 
_computing_molecular_graphics     'Bruker SHELXTL' 
_computing_publication_material   'Bruker SHELXTL' 
 
_refine_special_details 
; 
 Refinement of F^2^ against ALL reflections.  The weighted R-factor wR and 
 goodness of fit S are based on F^2^, conventional R-factors R are based 
 on F, with F set to zero for negative F^2^. The threshold expression of 
 F^2^ > 2sigma(F^2^) is used only for calculating R-factors(gt) etc. and is 
 not relevant to the choice of reflections for refinement.  R-factors based 
 on F^2^ are statistically about twice as large as those based on F, and R- 
 factors based on ALL data will be even larger. 
; 
 
_refine_ls_structure_factor_coef  Fsqd  
_refine_ls_matrix_type            full 
_refine_ls_weighting_scheme       calc  
_refine_ls_weighting_details 
 'calc w=1/[\s^2^(Fo^2^)+(0.0200P)^2^+1.5000P] where P=(Fo^2^+2Fc^2^)/3' 
_atom_sites_solution_primary      direct 
_atom_sites_solution_secondary    difmap 
_refine_ls_extinction_method      none 
_refine_ls_extinction_coef        ? 
_refine_ls_number_reflns          85 
_refine_ls_number_parameters      7 
_refine_ls_number_restraints      0 
_refine_ls_R_factor_all           0.0163 
_refine_ls_R_factor_gt            0.0163 
_refine_ls_wR_factor_ref          0.0444 
_refine_ls_wR_factor_gt           0.0444 
_refine_ls_goodness_of_fit_ref    1.007 
_refine_ls_restrained_S_all       1.007 
_refine_ls_shift/su_max           0.000 
_refine_ls_shift/su_mean          0.000 
 
loop_ 
 _atom_site_label 
 _atom_site_type_symbol 
 _atom_site_fract_x 
 _atom_site_fract_y 
 _atom_site_fract_z 
 _atom_site_U_iso_or_equiv 
 _atom_site_adp_type 
 _atom_site_occupancy 
 _atom_site_symmetry_multiplicity 
 _atom_site_calc_flag 
 _atom_site_refinement_flags 
 _atom_site_disorder_assembly 
 _atom_site_disorder_group 
Cs1 Cs 0.0000 0.0000 0.0000 0.0371(4) Uani 1 48 d S . . 
Hg1A Hg 0.5000 0.5000 0.5000 0.0160(3) Uani 0.947(5) 48 d SP . 1 
Tl1B Tl 0.352(7) 0.5000 0.5000 0.0160(3) Uani 0.0088(8) 8 d SP . 2 
Cl1 Cl 0.0000 0.5000 0.5000 0.079(2) Uani 1 16 d S . . 
 
loop_ 
 _atom_site_aniso_label 
 _atom_site_aniso_U_11 
 _atom_site_aniso_U_22 
 _atom_site_aniso_U_33 
 _atom_site_aniso_U_23 
 _atom_site_aniso_U_13 
 _atom_site_aniso_U_12 
Cs1 0.0371(4) 0.0371(4) 0.0371(4) 0.000 0.000 0.000 
Hg1A 0.0160(3) 0.0160(3) 0.0160(3) 0.000 0.000 0.000 
Tl1B 0.0160(3) 0.0160(3) 0.0160(3) 0.000 0.000 0.000 
Cl1 0.099(5) 0.069(2) 0.069(2) 0.000 0.000 0.000 
 
_geom_special_details 
; 
 All esds (except the esd in the dihedral angle between two l.s. planes) 
 are estimated using the full covariance matrix.  The cell esds are taken 
 into account individually in the estimation of esds in distances, angles 
 and torsion angles; correlations between esds in cell parameters are only 
 used when they are defined by crystal symmetry.  An approximate (isotropic) 
 treatment of cell esds is used for estimating esds involving l.s. planes. 
; 
 
loop_ 
 _geom_bond_atom_site_label_1 
 _geom_bond_atom_site_label_2 
 _geom_bond_distance 
 _geom_bond_site_symmetry_2 
 _geom_bond_publ_flag 
Cs1 Cl1 3.8007(8) 9 ? 
Cs1 Cl1 3.8007(8) 9_445 ? 
Cs1 Cl1 3.8007(8) . ? 
Cs1 Cl1 3.8007(8) 5 ? 
Cs1 Cl1 3.8007(8) 5_454 ? 
Cs1 Cl1 3.8007(8) 1_544 ? 
Cs1 Cl1 3.8007(8) 9_455 ? 
Cs1 Cl1 3.8007(8) 9_545 ? 
Cs1 Cl1 3.8007(8) 5_455 ? 
Cs1 Cl1 3.8007(8) 5_554 ? 
Cs1 Cl1 3.8007(8) 1_545 ? 
Cs1 Cl1 3.8007(8) 1_554 ? 
Hg1A Cl1 2.6875(5) 9_556 ? 
Hg1A Cl1 2.6875(5) . ? 
Hg1A Cl1 2.6875(5) 1_655 ? 
Hg1A Cl1 2.6875(5) 5 ? 
Hg1A Cl1 2.6875(5) 5_565 ? 
Hg1A Cl1 2.6875(5) 9 ? 
Tl1B Tl1B 1.12(5) 33_666 ? 
Tl1B Tl1B 1.12(5) 29_666 ? 
Tl1B Tl1B 1.12(5) 9 ? 
Tl1B Tl1B 1.12(5) 5 ? 
Tl1B Tl1B 1.59(8) 25_666 ? 
Tl1B Cl1 1.89(4) . ? 
Tl1B Cl1 2.802(11) 9_556 ? 
Tl1B Cl1 2.802(11) 5_565 ? 
Tl1B Cl1 2.802(11) 9 ? 
Tl1B Cl1 2.802(11) 5 ? 
Tl1B Cs1 4.246(17) 1_566 ? 
Cl1 Tl1B 1.89(4) 25_566 ? 
Cl1 Hg1A 2.6875(5) 1_455 ? 
Cl1 Tl1B 2.802(11) 33_666 ? 
Cl1 Tl1B 2.802(11) 9_455 ? 
Cl1 Tl1B 2.802(11) 29_666 ? 
Cl1 Tl1B 2.802(11) 5_455 ? 
Cl1 Tl1B 2.802(11) 33_566 ? 
Cl1 Tl1B 2.802(11) 9 ? 
Cl1 Tl1B 2.802(11) 5 ? 
Cl1 Tl1B 2.802(11) 29_566 ? 
 
loop_ 
 _geom_angle_atom_site_label_1 
 _geom_angle_atom_site_label_2 
 _geom_angle_atom_site_label_3 
 _geom_angle 
 _geom_angle_site_symmetry_1 
 _geom_angle_site_symmetry_3 
 _geom_angle_publ_flag 
Cl1 Cs1 Cl1 180.0 9 9_445 ? 
Cl1 Cs1 Cl1 60.0 9 . ? 
Cl1 Cs1 Cl1 120.0 9_445 . ? 
Cl1 Cs1 Cl1 60.0 9 5 ? 
Cl1 Cs1 Cl1 120.0 9_445 5 ? 
Cl1 Cs1 Cl1 60.0 . 5 ? 
Cl1 Cs1 Cl1 120.0 9 5_454 ? 
Cl1 Cs1 Cl1 60.0 9_445 5_454 ? 
Cl1 Cs1 Cl1 120.0 . 5_454 ? 
Cl1 Cs1 Cl1 180.0 5 5_454 ? 
Cl1 Cs1 Cl1 120.0 9 1_544 ? 
Cl1 Cs1 Cl1 60.0 9_445 1_544 ? 
Cl1 Cs1 Cl1 180.0 . 1_544 ? 
Cl1 Cs1 Cl1 120.0 5 1_544 ? 
Cl1 Cs1 Cl1 60.0 5_454 1_544 ? 
Cl1 Cs1 Cl1 90.0 9 9_455 ? 
Cl1 Cs1 Cl1 90.0 9_445 9_455 ? 
Cl1 Cs1 Cl1 60.0 . 9_455 ? 
Cl1 Cs1 Cl1 120.0 5 9_455 ? 
Cl1 Cs1 Cl1 60.0 5_454 9_455 ? 
Cl1 Cs1 Cl1 120.0 1_544 9_455 ? 
Cl1 Cs1 Cl1 90.0 9 9_545 ? 
Cl1 Cs1 Cl1 90.0 9_445 9_545 ? 
Cl1 Cs1 Cl1 120.0 . 9_545 ? 
Cl1 Cs1 Cl1 60.0 5 9_545 ? 
Cl1 Cs1 Cl1 120.0 5_454 9_545 ? 
Cl1 Cs1 Cl1 60.0 1_544 9_545 ? 
Cl1 Cs1 Cl1 180.0 9_455 9_545 ? 
Cl1 Cs1 Cl1 120.0 9 5_455 ? 
Cl1 Cs1 Cl1 60.0 9_445 5_455 ? 
Cl1 Cs1 Cl1 60.0 . 5_455 ? 
Cl1 Cs1 Cl1 90.0 5 5_455 ? 
Cl1 Cs1 Cl1 90.0 5_454 5_455 ? 
Cl1 Cs1 Cl1 120.0 1_544 5_455 ? 
Cl1 Cs1 Cl1 60.0 9_455 5_455 ? 
Cl1 Cs1 Cl1 120.0 9_545 5_455 ? 
Cl1 Cs1 Cl1 60.0 9 5_554 ? 
Cl1 Cs1 Cl1 120.0 9_445 5_554 ? 
Cl1 Cs1 Cl1 120.0 . 5_554 ? 
Cl1 Cs1 Cl1 90.0 5 5_554 ? 
Cl1 Cs1 Cl1 90.0 5_454 5_554 ? 
Cl1 Cs1 Cl1 60.0 1_544 5_554 ? 
Cl1 Cs1 Cl1 120.0 9_455 5_554 ? 
Cl1 Cs1 Cl1 60.0 9_545 5_554 ? 
Cl1 Cs1 Cl1 180.0 5_455 5_554 ? 
Cl1 Cs1 Cl1 120.0 9 1_545 ? 
Cl1 Cs1 Cl1 60.0 9_445 1_545 ? 
Cl1 Cs1 Cl1 90.0 . 1_545 ? 
Cl1 Cs1 Cl1 60.0 5 1_545 ? 
Cl1 Cs1 Cl1 120.0 5_454 1_545 ? 
Cl1 Cs1 Cl1 90.0 1_544 1_545 ? 
Cl1 Cs1 Cl1 120.0 9_455 1_545 ? 
Cl1 Cs1 Cl1 60.0 9_545 1_545 ? 
Cl1 Cs1 Cl1 60.0 5_455 1_545 ? 
Cl1 Cs1 Cl1 120.0 5_554 1_545 ? 
Cl1 Cs1 Cl1 60.0 9 1_554 ? 
Cl1 Cs1 Cl1 120.0 9_445 1_554 ? 
Cl1 Cs1 Cl1 90.0 . 1_554 ? 
Cl1 Cs1 Cl1 120.0 5 1_554 ? 
Cl1 Cs1 Cl1 60.0 5_454 1_554 ? 
Cl1 Cs1 Cl1 90.0 1_544 1_554 ? 
Cl1 Cs1 Cl1 60.0 9_455 1_554 ? 
Cl1 Cs1 Cl1 120.0 9_545 1_554 ? 
Cl1 Cs1 Cl1 120.0 5_455 1_554 ? 
Cl1 Cs1 Cl1 60.0 5_554 1_554 ? 
Cl1 Cs1 Cl1 180.0 1_545 1_554 ? 
Cl1 Hg1A Cl1 90.0 9_556 . ? 
Cl1 Hg1A Cl1 90.0 9_556 1_655 ? 
Cl1 Hg1A Cl1 180.0 . 1_655 ? 
Cl1 Hg1A Cl1 90.0 9_556 5 ? 
Cl1 Hg1A Cl1 90.0 . 5 ? 
Cl1 Hg1A Cl1 90.0 1_655 5 ? 
Cl1 Hg1A Cl1 90.0 9_556 5_565 ? 
Cl1 Hg1A Cl1 90.0 . 5_565 ? 
Cl1 Hg1A Cl1 90.0 1_655 5_565 ? 
Cl1 Hg1A Cl1 180.0 5 5_565 ? 
Cl1 Hg1A Cl1 180.0 9_556 9 ? 
Cl1 Hg1A Cl1 90.0 . 9 ? 
Cl1 Hg1A Cl1 90.0 1_655 9 ? 
Cl1 Hg1A Cl1 90.0 5 9 ? 
Cl1 Hg1A Cl1 90.0 5_565 9 ? 
Tl1B Tl1B Tl1B 60.000(12) 33_666 29_666 ? 
Tl1B Tl1B Tl1B 90.000(15) 33_666 9 ? 
Tl1B Tl1B Tl1B 60.000(9) 29_666 9 ? 
Tl1B Tl1B Tl1B 60.000(5) 33_666 5 ? 
Tl1B Tl1B Tl1B 90.000(12) 29_666 5 ? 
Tl1B Tl1B Tl1B 60.000(5) 9 5 ? 
Tl1B Tl1B Tl1B 45.000(9) 33_666 25_666 ? 
Tl1B Tl1B Tl1B 45.000(2) 29_666 25_666 ? 
Tl1B Tl1B Tl1B 45.000(9) 9 25_666 ? 
Tl1B Tl1B Tl1B 45.000(11) 5 25_666 ? 
Tl1B Tl1B Cl1 135.000(5) 33_666 . ? 
Tl1B Tl1B Cl1 135.000(3) 29_666 . ? 
Tl1B Tl1B Cl1 135.000(4) 9 . ? 
Tl1B Tl1B Cl1 135.000(7) 5 . ? 
Tl1B Tl1B Cl1 180.000(2) 25_666 . ? 
Tl1B Tl1B Cl1 28.6(7) 33_666 9_556 ? 
Tl1B Tl1B Cl1 78.5(5) 29_666 9_556 ? 
Tl1B Tl1B Cl1 118.6(7) 9 9_556 ? 
Tl1B Tl1B Cl1 78.5(5) 5 9_556 ? 
Tl1B Tl1B Cl1 73.6(7) 25_666 9_556 ? 
Cl1 Tl1B Cl1 106.4(7) . 9_556 ? 
Tl1B Tl1B Cl1 78.5(5) 33_666 5_565 ? 
Tl1B Tl1B Cl1 28.6(7) 29_666 5_565 ? 
Tl1B Tl1B Cl1 78.5(5) 9 5_565 ? 
Tl1B Tl1B Cl1 118.6(7) 5 5_565 ? 
Tl1B Tl1B Cl1 73.6(7) 25_666 5_565 ? 
Cl1 Tl1B Cl1 106.4(7) . 5_565 ? 
Cl1 Tl1B Cl1 85.4(4) 9_556 5_565 ? 
Tl1B Tl1B Cl1 118.6(7) 33_666 9 ? 
Tl1B Tl1B Cl1 78.5(5) 29_666 9 ? 
Tl1B Tl1B Cl1 28.6(7) 9 9 ? 
Tl1B Tl1B Cl1 78.5(5) 5 9 ? 
Tl1B Tl1B Cl1 73.6(7) 25_666 9 ? 
Cl1 Tl1B Cl1 106.4(7) . 9 ? 
Cl1 Tl1B Cl1 147.1(15) 9_556 9 ? 
Cl1 Tl1B Cl1 85.4(4) 5_565 9 ? 
Tl1B Tl1B Cl1 78.5(5) 33_666 5 ? 
Tl1B Tl1B Cl1 118.6(7) 29_666 5 ? 
Tl1B Tl1B Cl1 78.5(5) 9 5 ? 
Tl1B Tl1B Cl1 28.6(7) 5 5 ? 
Tl1B Tl1B Cl1 73.6(7) 25_666 5 ? 
Cl1 Tl1B Cl1 106.4(7) . 5 ? 
Cl1 Tl1B Cl1 85.4(4) 9_556 5 ? 
Cl1 Tl1B Cl1 147.1(15) 5_565 5 ? 
Cl1 Tl1B Cl1 85.4(4) 9 5 ? 
Tl1B Tl1B Cs1 139.7(3) 33_666 . ? 
Tl1B Tl1B Cs1 139.7(3) 29_666 . ? 
Tl1B Tl1B Cs1 82.4(4) 9 . ? 
Tl1B Tl1B Cs1 82.4(4) 5 . ? 
Tl1B Tl1B Cs1 116.5(5) 25_666 . ? 
Cl1 Tl1B Cs1 63.5(5) . . ? 
Cl1 Tl1B Cs1 137.2(3) 9_556 . ? 
Cl1 Tl1B Cs1 137.2(3) 5_565 . ? 
Cl1 Tl1B Cs1 61.3(2) 9 . ? 
Cl1 Tl1B Cs1 61.3(2) 5 . ? 
Tl1B Tl1B Cs1 82.4(4) 33_666 1_566 ? 
Tl1B Tl1B Cs1 82.4(4) 29_666 1_566 ? 
Tl1B Tl1B Cs1 139.7(3) 9 1_566 ? 
Tl1B Tl1B Cs1 139.7(3) 5 1_566 ? 
Tl1B Tl1B Cs1 116.5(5) 25_666 1_566 ? 
Cl1 Tl1B Cs1 63.5(5) . 1_566 ? 
Cl1 Tl1B Cs1 61.3(2) 9_556 1_566 ? 
Cl1 Tl1B Cs1 61.3(2) 5_565 1_566 ? 
Cl1 Tl1B Cs1 137.2(3) 9 1_566 ? 
Cl1 Tl1B Cs1 137.2(3) 5 1_566 ? 
Cs1 Tl1B Cs1 127.0(9) . 1_566 ? 
Tl1B Cl1 Tl1B 180.000(5) 25_566 . ? 
Tl1B Cl1 Hg1A 0.000(2) 25_566 1_455 ? 
Tl1B Cl1 Hg1A 180.000(2) . 1_455 ? 
Tl1B Cl1 Hg1A 180.000(2) 25_566 . ? 
Tl1B Cl1 Hg1A 0.000(2) . . ? 
Hg1A Cl1 Hg1A 180.0 1_455 . ? 
Tl1B Cl1 Tl1B 163.6(7) 25_566 33_666 ? 
Tl1B Cl1 Tl1B 16.4(7) . 33_666 ? 
Hg1A Cl1 Tl1B 163.6(7) 1_455 33_666 ? 
Hg1A Cl1 Tl1B 16.4(7) . 33_666 ? 
Tl1B Cl1 Tl1B 16.4(7) 25_566 9_455 ? 
Tl1B Cl1 Tl1B 163.6(7) . 9_455 ? 
Hg1A Cl1 Tl1B 16.4(7) 1_455 9_455 ? 
Hg1A Cl1 Tl1B 163.6(7) . 9_455 ? 
Tl1B Cl1 Tl1B 180.0 33_666 9_455 ? 
Tl1B Cl1 Tl1B 163.6(7) 25_566 29_666 ? 
Tl1B Cl1 Tl1B 16.4(7) . 29_666 ? 
Hg1A Cl1 Tl1B 163.6(7) 1_455 29_666 ? 
Hg1A Cl1 Tl1B 16.4(7) . 29_666 ? 
Tl1B Cl1 Tl1B 23.1(10) 33_666 29_666 ? 
Tl1B Cl1 Tl1B 156.9(10) 9_455 29_666 ? 
Tl1B Cl1 Tl1B 16.4(7) 25_566 5_455 ? 
Tl1B Cl1 Tl1B 163.6(7) . 5_455 ? 
Hg1A Cl1 Tl1B 16.4(7) 1_455 5_455 ? 
Hg1A Cl1 Tl1B 163.6(7) . 5_455 ? 
Tl1B Cl1 Tl1B 156.9(10) 33_666 5_455 ? 
Tl1B Cl1 Tl1B 23.1(10) 9_455 5_455 ? 
Tl1B Cl1 Tl1B 180.000(1) 29_666 5_455 ? 
Tl1B Cl1 Tl1B 16.4(7) 25_566 33_566 ? 
Tl1B Cl1 Tl1B 163.6(7) . 33_566 ? 
Hg1A Cl1 Tl1B 16.4(7) 1_455 33_566 ? 
Hg1A Cl1 Tl1B 163.6(7) . 33_566 ? 
Tl1B Cl1 Tl1B 147.1(15) 33_666 33_566 ? 
Tl1B Cl1 Tl1B 32.9(15) 9_455 33_566 ? 
Tl1B Cl1 Tl1B 156.9(10) 29_666 33_566 ? 
Tl1B Cl1 Tl1B 23.1(10) 5_455 33_566 ? 
Tl1B Cl1 Tl1B 163.6(7) 25_566 9 ? 
Tl1B Cl1 Tl1B 16.4(7) . 9 ? 
Hg1A Cl1 Tl1B 163.6(7) 1_455 9 ? 
Hg1A Cl1 Tl1B 16.4(7) . 9 ? 
Tl1B Cl1 Tl1B 32.9(15) 33_666 9 ? 
Tl1B Cl1 Tl1B 147.1(15) 9_455 9 ? 
Tl1B Cl1 Tl1B 23.1(10) 29_666 9 ? 
Tl1B Cl1 Tl1B 156.9(10) 5_455 9 ? 
Tl1B Cl1 Tl1B 180.000(1) 33_566 9 ? 
Tl1B Cl1 Tl1B 163.6(7) 25_566 5 ? 
Tl1B Cl1 Tl1B 16.4(7) . 5 ? 
Hg1A Cl1 Tl1B 163.6(7) 1_455 5 ? 
Hg1A Cl1 Tl1B 16.4(7) . 5 ? 
Tl1B Cl1 Tl1B 23.1(10) 33_666 5 ? 
Tl1B Cl1 Tl1B 156.9(10) 9_455 5 ? 
Tl1B Cl1 Tl1B 32.9(15) 29_666 5 ? 
Tl1B Cl1 Tl1B 147.1(15) 5_455 5 ? 
Tl1B Cl1 Tl1B 156.9(10) 33_566 5 ? 
Tl1B Cl1 Tl1B 23.1(10) 9 5 ? 
Tl1B Cl1 Tl1B 16.4(7) 25_566 29_566 ? 
Tl1B Cl1 Tl1B 163.6(7) . 29_566 ? 
Hg1A Cl1 Tl1B 16.4(7) 1_455 29_566 ? 
Hg1A Cl1 Tl1B 163.6(7) . 29_566 ? 
Tl1B Cl1 Tl1B 156.9(10) 33_666 29_566 ? 
Tl1B Cl1 Tl1B 23.1(10) 9_455 29_566 ? 
Tl1B Cl1 Tl1B 147.1(15) 29_666 29_566 ? 
Tl1B Cl1 Tl1B 32.9(15) 5_455 29_566 ? 
Tl1B Cl1 Tl1B 23.1(10) 33_566 29_566 ? 
Tl1B Cl1 Tl1B 156.9(10) 9 29_566 ? 
Tl1B Cl1 Tl1B 180.000(2) 5 29_566 ? 
 
_diffrn_measured_fraction_theta_max    1.000 
_diffrn_reflns_theta_full              32.49 
_diffrn_measured_fraction_theta_full   1.000 
_refine_diff_density_max    1.082 
_refine_diff_density_min   -1.283 
_refine_diff_density_rms    0.189 


#  end 3 of 3
